# Supplementary material
Source: publisher figshare collection journal article supplement (https://gsajournals.figshare.com/ndownloader/files/14358347)
Supplement: Supplementary file 1 [file 14358347]

## Sheet: Sheet1
Table S9. Data from genes mapped to the region under QTL intervals, based on Flybase release version FB2018_1. Highlighted genes indicate those previously identified in QTL mapping studies of starvation resistance
Panel/Trait	QTL	Chromosome	Position	Gene Symbol	FlyBase ID	Association with Starvation-Related Trait
pA Female Starvation Resistance	SA2	2R	9240041	Cyp4p1	FBgn0015037
	SA2	2R	9587953	clos	FBgn0261016
	SA2	2R	9095685	snoRNA:Or-aca5	FBgn0086672
	SA2	2R	9578905	lncRNA:CR46257	FBgn0267990
	SA2	2R	9260278	CG34141	FBgn0083977
	SA2	2R	9087834	Dbp45A	FBgn0010220
	SA2	2R	9566146	Not1	FBgn0085436
	SA2	2R	9446046	Camta	FBgn0259234
	SA2	2R	9395330	CG8800	FBgn0033408
	SA2	2R	9019032	CG8170	FBgn0033365
	SA2	2R	9541947	CG1888	FBgn0033421
	SA2	2R	9599909	CG30340	FBgn0050340
	SA2	2R	9601431	CG30339	FBgn0050339
	SA2	2R	9039728	Ance-4	FBgn0033366
	SA2	2R	9096237	snoRNA:Me28S-A982a	FBgn0082943
	SA2	2R	9605988	GstT1	FBgn0050000
	SA2	2R	9195205	unpg	FBgn0015561
	SA2	2R	9552844	lncRNA:CR43651	FBgn0263660
	SA2	2R	9122125	GstE13	FBgn0033381
	SA2	2R	9636996	lncRNA:CR44070	FBgn0264879
	SA2	2R	9291856	Drep2	FBgn0028408
	SA2	2R	9017815	CG13747	FBgn0033364
	SA2	2R	9302823	Myd88	FBgn0033402
	SA2	2R	9561638	CG1809	FBgn0033423
	SA2	2R	9310329	lncRNA:CR45918	FBgn0267578
	SA2	2R	9400531	wun	FBgn0016078
	SA2	2R	9138486	CG8788	FBgn0028955
	SA2	2R	9286827	CG1968	FBgn0033401
	SA2	2R	9214095	lncRNA:CR44451	FBgn0265644
	SA2	2R	9503765	brp	FBgn0259246	adult locomotor behavior; Wagh et al. 2006
	SA2	2R	9116122	Su(var)2-10	FBgn0003612
	SA2	2R	9424087	prel	FBgn0033413
	SA2	2R	9399080	l(2)k10201	FBgn0016970
	SA2	2R	9096931	CG8078	FBgn0033375
	SA2	2R	9577427	CG1814	FBgn0033426
	SA2	2R	9586110	CG12929	FBgn0033429
	SA2	2R	9453409	CG33758	FBgn0053758
	SA2	2R	9082395	CNT1	FBgn0033371
	SA2	2R	9044850	CG13743	FBgn0033368	starvation resistance candidate; Harbison et al. 2005
	SA2	2R	9114274	Phax	FBgn0033380
	SA2	2R	9103238	Vang	FBgn0015838
	SA2	2R	9161484	lncRNA:CR44283	FBgn0265310
	SA2	2R	9237512	Cyp4p2	FBgn0033395	sleep; Thimgan et al. 2015
	SA2	2R	9309296	CG13739	FBgn0033403
	SA2	2R	9584643	Updo	FBgn0033428
	SA2	2R	9454297	CG33757	FBgn0053757
	SA2	2R	9608128	CG12926	FBgn0033437
	SA2	2R	9095996	snoRNA:Me28S-G3255a	FBgn0082928
	SA2	2R	9621234	mir-307b	FBgn0262172
	SA2	2R	9362574	CG12158	FBgn0040775
	SA2	2R	9587193	RpL31	FBgn0285949
	SA2	2R	9186670	CG8026	FBgn0033391
	SA2	2R	9559255	asRNA:CR45281	FBgn0266819
	SA2	2R	9062295	ana	FBgn0011746	starvation resistance candidate; Harbison et al. 2005
	SA2	2R	9204410	CG8027	FBgn0033392
	SA2	2R	9494166	Wnt2	FBgn0004360
	SA2	2R	9107151	Pmm45A	FBgn0033377	carbohydrate metabolic process; FlyBase Curators et al. 2004
	SA2	2R	9345349	Or45a	FBgn0033404
	SA2	2R	9111505	Mys45A	FBgn0033379
	SA2	2R	9084598	CG13742	FBgn0033372
	SA2	2R	9162037	CG8046	FBgn0033388
	SA2	2R	9242320	Cyp4p3	FBgn0033397
	SA2	2R	9421972	CG13955	FBgn0033412
	SA2	2R	9610464	asRNA:CR44069	FBgn0264878
	SA2	2R	9167763	Rme-8	FBgn0015477
	SA2	2R	9611139	Mmp2	FBgn0033438	adult fat body development; Jia et al. 2014
	SA2	2R	9042261	PPO2	FBgn0033367
	SA2	2R	9183395	lncRNA:CR44284	FBgn0265311
	SA2	2R	9553762	mir-14	FBgn0262447	response to starvation; Varghese et al. 2010; regulation of lipid metabolic process; Xu et al. 2003; insulin like growth factor receptor signalling pathway; Varghese et al. 2010
	SA2	2R	9123304	CG18659	FBgn0027561
	SA2	2R	9157907	CG8008	FBgn0033387
	SA2	2R	9060461	CG8197	FBgn0033369
	SA2	2R	9434669	ced-6	FBgn0029092
	SA2	2R	9227785	hig	FBgn0010114
	SA2	2R	9186670	CG45085	FBgn0266486
	SA2	2R	9396265	Non1	FBgn0028473
	SA2	2R	9426439	Pdk	FBgn0017558
	SA2	2R	9092506	CG13741	FBgn0033374
	SA2	2R	9096763	snoRNA:Me28S-G3255b	FBgn0082927
	SA2	2R	9559598	Or45b	FBgn0033422
	SA2	2R	9095372	snoRNA:Psi28S-2949	FBgn0082981
	SA2	2R	9590867	Map60	FBgn0010342
	SA2	2R	9165632	Rad51D	FBgn0033389
	SA2	2R	9089774	CG8080	FBgn0033373
	SA2	2R	9143956	Prp38	FBgn0050342
	SA2	2R	9110799	tsu	FBgn0033378
	SA2	2R	9445444	lncRNA:CR45321	FBgn0266860
	SA2	2R	9313023	mir-987	FBgn0262220
	SA2	2R	9285310	CG2063	FBgn0033400
	SA2	2R	9399753	CG33774	FBgn0053774
	SA2	2R	9284845	asRNA:CR45132	FBgn0266625
	SA2	2R	9138486	CG44286	FBgn0265313
	SA2	2R	9132480	Hydr1	FBgn0033382	cellular lipid metabolic process; Gaudet et al. 2010; lipid metabolic process; Wisotzkey et al. 2003
	SA2	2R	9589050	CG1827	FBgn0033431
	SA2	2R	9098539	CG8777	FBgn0033376
	SA2	2R	9142146	shrb	FBgn0086656
	SA2	2R	9014368	CG13744	FBgn0033363
	SA2	2R	9096506	snoRNA:Me28S-A982b	FBgn0082942
	SA2	2R	9252021	CG30343	FBgn0050343
	SA2	2R	9007234	CG8172	FBgn0033362
	SA2	2R	9166566	CG42382	FBgn0259728
	SA2	2R	9288957	Mad1	FBgn0026326
	SA2	2R	9621251	mir-307a	FBgn0262385
	SA2	2R	9390165	l(2)03659	FBgn0010549
	SA2	2R	9252310	Pkn	FBgn0020621
	SA2	2R	9075158	asRNA:CR45924	FBgn0267586
	SA2	2R	9213125	lncRNA:CR45309	FBgn0266847
	SA2	2R	9207561	VhaAC45	FBgn0262515
	SA2	2R	9414342	wun2	FBgn0041087
	SA2	2R	9078721	CNT2	FBgn0025709
	SA2	2R	9095273	Uhg4	FBgn0083124
	SA2	2R	9145260	CG30344	FBgn0050344
	SA2	2R	9148689	CG30345	FBgn0050345
	SA2	2R	9594045	CG30338	FBgn0050338
	SA2	2R	9581761	Smyd4-1	FBgn0033427
	SA2	2R	9594045	CG1902	FBgn0033434
	SA2	2R	9309296	CG13954	FBgn0033405
	SA2	2R	9177864	Rab32	FBgn0002567	regulation of lipid storage; Wang et al. 2012
	SA2	2R	9135375	alc	FBgn0260972
	SA2	2R	9097030	snoRNA:Or-CD2	FBgn0086603
	SA2	2R	9605639	lncRNA:CR44285	FBgn0265312
	SA2	2R	9607292	GstT2	FBgn0050005
	SA2	2R	17034045	CG43371	FBgn0263114
	SA3	2R	17133445	Acp54A1	FBgn0083936
	SA3	2R	17007674	Ehbp1	FBgn0034180
	SA3	2R	16995991	CG30461	FBgn0050461
	SA3	2R	17413970	cnk	FBgn0286070
	SA3	2R	17518223	CG4866	FBgn0034232
	SA3	2R	17216549	mbl	FBgn0265487
	SA3	2R	17048875	CG9646	FBgn0034184
	SA3	2R	17440297	CG18467	FBgn0034218
	SA3	2R	17000244	ste24a	FBgn0034176
	SA3	2R	17477565	CG43110	FBgn0262570
	SA3	2R	17431032	Lhr	FBgn0034217
	SA3	2R	17046839	SmydA-6	FBgn0034183
	SA3	2R	17457663	CG14478	FBgn0028953
	SA3	2R	17539322	Cc2d2a	FBgn0263113
	SA3	2R	17128480	Cda9	FBgn0034197	carbohydrate metabolic process; FlyCurators et al. 2004
	SA3	2R	17134129	CG11400	FBgn0034198
	SA3	2R	17139450	CG43103	FBgn0262563
	SA3	2R	17262339	lncRNA:CR45997	FBgn0267659
	SA3	2R	17136451	Gbp1	FBgn0034199
	SA3	2R	17059331	CG8950	FBgn0034186	starvation resistance candidate; Sørensen et al. 2007
	SA3	2R	17517261	APC10	FBgn0034231
	SA3	2R	17185096	lncRNA:CR44387	FBgn0265537
	SA3	2R	17475214	insb	FBgn0034224
	SA3	2R	17005451	CG6805	FBgn0034179
	SA3	2R	17465879	Tes	FBgn0034223
	SA3	2R	17255241	CG43272	FBgn0262961
	SA3	2R	16995991	ste24c	FBgn0050462
	SA3	2R	17154589	CG17290	FBgn0034201
	SA3	2R	17478158	veil	FBgn0034225
	SA3	2R	17455743	robls54B	FBgn0263233
	SA3	2R	17453399	CG10764	FBgn0034221
	SA3	2R	17508995	CG34193	FBgn0085222
	SA3	2R	17386841	lncRNA:CR44344	FBgn0265444
	SA3	2R	17502354	nw	FBgn0283508
	SA3	2R	17062775	CG6967	FBgn0034187
	SA3	2R	17040195	asRNA:CR45145	FBgn0266638
	SA3	2R	17246530	CG12699	FBgn0046294
	SA3	2R	17412767	Prosalpha5	FBgn0016697
	SA3	2R	17448533	mthl3	FBgn0028956	response to starvation; UniProt Curators et al. 2002; determination of adult lifespan; UniProt Curators et al. 2002
	SA3	2R	16998610	ste24b	FBgn0034175
	SA3	2R	17205208	CG43237	FBgn0262882
	SA3	2R	17027190	RhoGEF2	FBgn0023172
	SA3	2R	17188796	lncRNA:CR44389	FBgn0265539
	SA3	2R	17108844	CG15611	FBgn0034194
	SA3	2R	17408258	CG30101	FBgn0050101
	SA3	2R	17140579	asRNA:CR44386	FBgn0265536
	SA3	2R	17100241	CG30456	FBgn0050456
	SA3	2R	17165084	CG10953	FBgn0034204
	SA3	2R	17137240	Gbp2	FBgn0034200
	SA3	2R	17514217	CG4853	FBgn0034230
	SA3	2R	17195203	CG10950	FBgn0034205
	SA3	2R	17088441	Sply	FBgn0010591
	SA3	2R	16964295	lncRNA:CR44376	FBgn0265526
	SA3	2R	17091984	CG6984	FBgn0034191
	SA3	2R	17131045	lncRNA:CR45273	FBgn0266811
	SA3	2R	17126410	CG15605	FBgn0034196
	SA3	2R	17432173	EDTP	FBgn0027506	starvation resistance candidate; Sørensen et al. 2007
	SA3	2R	16973927	Cbp53E	FBgn0004580
	SA3	2R	17187504	CG44388	FBgn0265538
	SA3	2R	17054546	tef	FBgn0086350
	SA3	2R	17145300	tRNA:Leu-AAG-1-3	FBgn0050235
	SA3	2R	17122898	Spn53F	FBgn0034195
	SA3	2R	17143521	snoRNA:U3:54Aa	FBgn0065048
	SA3	2R	17143965	tRNA:Leu-AAG-1-2	FBgn0050234
	SA3	2R	17135595	CR44391	FBgn0265541
	SA3	2R	16969395	lncRNA:CR44377	FBgn0265527
	SA3	2R	17493695	CG30103	FBgn0050103
	SA3	2R	17160122	CG30457	FBgn0050457
	SA3	2R	17020027	Dark	FBgn0263864	response to starvation; Obata et al. 2014; triglyceride homeostasis; Obata et al. 2014
	SA3	2R	16968008	tRNA:Gly-GCC-1-8	FBgn0011867
	SA3	2R	17511513	CG4847	FBgn0034229
	SA3	2R	17036695	asRNA:CR45144	FBgn0266637
	SA3	2R	17032487	CG43327	FBgn0263032
	SA3	2R	17189305	lncRNA:CR45323	FBgn0266862
	SA3	2R	17121095	asRNA:CR45272	FBgn0266810
	SA3	2R	17124764	Amy-d	FBgn0000078	carbohydrate metabolic process; FlyCurators et al. 2004
	SA3	2R	17118636	Amy-p	FBgn0000079	carbohydrate metabolic process; FlyCurators et al. 2004
	SA3	2R	17536213	eIF3b	FBgn0034237
	SA3	2R	17032487	CG43328	FBgn0263033
	SA3	2R	17253156	lncRNA:CR43660	FBgn0263708
	SA3	2R	17420407	l(2)k01209	FBgn0022029
	SA3	2R	17001994	AsnRS-m	FBgn0034177
	SA3	2R	17427795	Mtap	FBgn0034215
	SA3	2R	17519024	Patronin	FBgn0263197
	SA3	2R	17054002	fat-spondin	FBgn0026721
	SA3	2R	17485002	NT5E-2	FBgn0050104
	SA3	2R	17445185	mthl4	FBgn0034219	response to starvation; UniProt Curators 2002; determination of adult lifespan; UniProt Curators 2002
	SA3	2R	17158325	CG30458	FBgn0050458
	SA3	2R	17016226	CG8963	FBgn0034181
	SA3	2R	17003563	NiPp1	FBgn0026402
	SA3	2R	17044743	SmydA-7	FBgn0034182
	SA3	2R	17245769	CG18469	FBgn0034206
	SA3	2R	17456472	robl	FBgn0024196
	SA3	2R	17391774	tRNA:Ala-TGC-1-1	FBgn0050232
	SA3	2R	17394593	CG10939	FBgn0010620
	SA3	2R	17429353	Bap55	FBgn0025716
	SA3	2R	17257156	CG43108	FBgn0262568
	SA3	2R	17405304	CG6568	FBgn0034210
	SA3	2R	17065971	CG30460	FBgn0050460
	SA3	2R	17392215	tRNA:Ala-TGC-2-1	FBgn0011879
	SA3	2R	17425670	CG6550	FBgn0034214
	SA3	2R	17145654	snoRNA:U3:54Ab	FBgn0065047
	SA3	2R	17140495	CG43107	FBgn0262567
	SA3	2R	17245061	lncRNA:CR46235	FBgn0267955
	SA3	2R	17469624	qkr54B	FBgn0022987
	SA3	2R	17093246	GstS1	FBgn0010226
	SA3	2R	17306759	lncRNA:CR43661	FBgn0263709
	SA3	2R	17156534	CG17287	FBgn0034202
	SA3	2R	17023652	asRNA:CR44390	FBgn0265540
	SA3	2R	18278198	sbb	FBgn0285917	larval locomotory behavior; Yang et al. 2000; starvation resistance candidate; Sørensen et al. 2007
	SA4	2R	18621541	CG5335	FBgn0034365
	SA4	2R	18456602	CG30116	FBgn0028496
	SA4	2R	18727817	List	FBgn0034381
	SA4	2R	18377487	lncRNA:CR42736	FBgn0261700
	SA4	2R	18297070	CG18538	FBgn0034324	starvation resistance candidate; Sørensen et al. 2007
	SA4	2R	18387895	IM3	FBgn0040736
	SA4	2R	18627918	Eip55E	FBgn0000566
	SA4	2R	18386602	IM2	FBgn0025583
	SA4	2R	18383949	IM1	FBgn0034329
	SA4	2R	18720169	mir-4982	FBgn0263522
	SA4	2R	18514574	CG43066	FBgn0262476
	SA4	2R	18615988	CG5327	FBgn0034363
	SA4	2R	18678680	CG44434	FBgn0265626
	SA4	2R	18396638	GstE10	FBgn0063499
	SA4	2R	18615060	CG5323	FBgn0034362
	SA4	2R	18297795	CG18539	FBgn0034325
	SA4	2R	18775411	asRNA:CR43964	FBgn0264679
	SA4	2R	18440965	slim	FBgn0261477
	SA4	2R	18616692	CG5493	FBgn0034364
	SA4	2R	18382704	IM23	FBgn0034328
	SA4	2R	18819467	Phb2	FBgn0010551
	SA4	2R	18696585	CG15071	FBgn0034377
	SA4	2R	18406011	GstE6	FBgn0063494
	SA4	2R	18783299	CG15080	FBgn0034391
	SA4	2R	18822188	CG15097	FBgn0034396
	SA4	2R	18613090	CG10927	FBgn0034360
	SA4	2R	18311822	Tango8	FBgn0040737
	SA4	2R	18539585	Rgk2	FBgn0085419
	SA4	2R	18446548	CG30120	FBgn0050120
	SA4	2R	18409796	imd	FBgn0013983
	SA4	2R	18629594	zda	FBgn0034368
	SA4	2R	18718114	Hs3st-A	FBgn0053147
	SA4	2R	18398393	GstE1	FBgn0034335
	SA4	2R	18402474	CR43688	FBgn0263771
	SA4	2R	18388995	CG16836	FBgn0040735
	SA4	2R	18446548	CG5189	FBgn0034350
	SA4	2R	18536767	Pepck	FBgn0003067	gluconeogenesis; Sardiello et al 2003
	SA4	2R	18743806	CG17821	FBgn0034383
	SA4	2R	18658418	CG42306	FBgn0259202
	SA4	2R	18796975	MFS14	FBgn0010651
	SA4	2R	18409048	GstE9	FBgn0063491
	SA4	2R	18640862	SP2637	FBgn0034371
	SA4	2R	18684230	CG44433	FBgn0265625
	SA4	2R	18295928	CG18537	FBgn0034323
	SA4	2R	18614210	mRpS28	FBgn0034361
	SA4	2R	18705977	CG15073	FBgn0034379
	SA4	2R	18688132	Sik3	FBgn0262103	response to starvation; Wang et al. 2011; lipid homeostasis; Wang et al. 2011; circadian sleep/wake cycle, sleep; Funato et al. 2016
	SA4	2R	18678680	CG44435	FBgn0265627
	SA4	2R	18770131	tRNA:Leu-AAG-1-4	FBgn0050229
	SA4	2R	18536767	CG45087	FBgn0266488
	SA4	2R	18742517	CG18609	FBgn0034382
	SA4	2R	18658418	Gint3	FBgn0034372
	SA4	2R	18393666	Idgf5	FBgn0064237	carbohydrate metabolic process; FlyCurators et al. 2004
	SA4	2R	18711391	lncRNA:CR33942	FBgn0062961
	SA4	2R	18794618	MFS15	FBgn0034392
	SA4	2R	18302945	CG14505	FBgn0034327
	SA4	2R	18401846	CR43687	FBgn0263770
	SA4	2R	18814938	lncRNA:CR43418	FBgn0263337
	SA4	2R	18667527	edl	FBgn0023214
	SA4	2R	18426421	PIG-O	FBgn0034346
	SA4	2R	18404605	GstE5	FBgn0063495
	SA4	2R	18640194	CheA56a	FBgn0262595
	SA4	2R	18407834	GstE8	FBgn0063492
	SA4	2R	18554119	GEFmeso	FBgn0050115
	SA4	2R	18399486	GstE2	FBgn0063498
	SA4	2R	18294759	CG18536	FBgn0034322
	SA4	2R	18639726	tRNA:Gly-GCC-1-9	FBgn0011868
	SA4	2R	18775669	CG15093	FBgn0034390
	SA4	2R	18830331	CG15082	FBgn0034397
	SA4	2R	18761758	Mctp	FBgn0034389
	SA4	2R	18754995	Cyp12b2	FBgn0034387
	SA4	2R	18403248	GstE4	FBgn0063496
	SA4	2R	18447361	Prp19	FBgn0261119
	SA4	2R	18687372	CG42855	FBgn0262102
	SA4	2R	18452737	CG17669	FBgn0034352
	SA4	2R	18421413	CG5174	FBgn0034345
	SA4	2R	18503608	GstE11	FBgn0034354
	SA4	2R	18451284	rswl	FBgn0034351
	SA4	2R	18815654	lncRNA:CR46234	FBgn0267954
	SA4	2R	18288696	CG14502	FBgn0034321
	SA4	2R	18738492	CG33998	FBgn0053998
	SA4	2R	18757074	Jabba	FBgn0259682
	SA4	2R	18625249	Sec6	FBgn0266671
	SA4	2R	18384824	CG15067	FBgn0034331
	SA4	2R	18412027	Dp1	FBgn0027835
	SA4	2R	18381393	CG43202	FBgn0262838
	SA4	2R	18400713	GstE3	FBgn0063497	gluconeogenesis; Saisawang et al. 2012
	SA4	2R	18527430	CG10924	FBgn0034356
	SA4	2R	18632328	CG30122	FBgn0050122	starvation resistance candidate; Sørensen et al. 2007
	SA4	2R	18390353	CG15068	FBgn0040733
	SA4	2R	18541144	lncRNA:CR46271	FBgn0283428
	SA4	2R	18620466	Atg7	FBgn0034366	response to starvation; Hou et al. 2008; determination of adult lifespan; Juhász et al. 2007
	SA4	2R	18384567	CG18107	FBgn0034330
	SA4	2R	18430315	Ttd14	FBgn0284257
	SA4	2R	18739131	lncRNA:CR30121	FBgn0050121
	SA4	2R	18611645	CG42697	FBgn0261587
	SA4	2R	18664449	CG33136	FBgn0053136
	SA4	2R	18808356	CG15096	FBgn0034394
	SA4	2R	18639557	tRNA:Trp-CCA-2-2	FBgn0050227
	SA4	2R	18389959	CG15065	FBgn0040734
	SA4	2R	18406924	GstE7	FBgn0063493
	SA4	2R	18805595	lncRNA:CR44468	FBgn0265661
	SA4	2R	18299317	CG18540	FBgn0034326
	SA4	2R	18708152	Vps51	FBgn0034380
	SA4	3L	3612192	CG10359	FBgn0035452
	SA5	3L	3688786	lncRNA:CR43484	FBgn0263495
	SA5	3L	3428658	eIF5B	FBgn0026259
	SA5	3L	3825449	Rdh	FBgn0064227	carbohydrate metabolic process; FlyCurators et al. 2004
	SA5	3L	3693752	lncRNA:CR43485	FBgn0263496
	SA5	3L	3471555	CG32267	FBgn0052267
	SA5	3L	3815839	Acp63F	FBgn0015585
	SA5	3L	3899259	Ubi-p63E	FBgn0003943
	SA5	3L	3897444	Ccz1	FBgn0035470
	SA5	3L	3620433	CG14974	FBgn0040694
	SA5	3L	3714826	CG32264	FBgn0052264
	SA5	3L	3653405	CG10862	FBgn0035455
	SA5	3L	3483832	CG43074	FBgn0262484
	SA5	3L	3466428	CycJ	FBgn0010317
	SA5	3L	3472447	CG42324	FBgn0259224
	SA5	3L	3714027	CG43089	FBgn0262535
	SA5	3L	3615382	CG10357	FBgn0035453	lipid catabolic process; FlyBase Curators et al. 2004
	SA5	3L	3803832	ntc	FBgn0035461
	SA5	3L	3810312	CG32263	FBgn0052263
	SA5	3L	3811263	PIG-B	FBgn0035464
	SA5	3L	3818679	enc	FBgn0004875
	SA5	3L	3806710	IntS10	FBgn0035462
	SA5	3L	3892574	Fie	FBgn0026592
	SA5	3L	3510974	ImpE2	FBgn0001254
	SA5	3L	3468023	CG14971	FBgn0035449
	SA5	3L	3815442	lncRNA:CR45034	FBgn0266394
	SA5	3L	3814211	Scsalpha	FBgn0004888
	SA5	3L	3846206	Awh	FBgn0013751
	SA5	3L	3884481	lncRNA:CR43917	FBgn0264518
	SA5	3L	3790804	CG32266	FBgn0052266
	SA5	3L	3401153	sty	FBgn0014388
	SA5	3L	3555631	lncRNA:CR45820	FBgn0267470
	SA5	3L	3461317	armi	FBgn0041164
	SA5	3L	3659068	CG43098	FBgn0262544
	SA5	3L	3894999	Gr63a	FBgn0035468	determination of adult lifespan; Poon et al. 2010; sensory perception of taste; Dunipace et al. 2001
	SA5	3L	3891646	lncRNA:CR45422	FBgn0266971
	SA5	3L	3905344	ida	FBgn0041147
	SA5	3L	3863704	lncRNA:CR45379	FBgn0266928
	SA5	3L	3909973	Eip63F-1	FBgn0004910
	SA5	3L	3593823	snRNA:U7	FBgn0053504
	SA5	3L	3814698	lncRNA:CR43932	FBgn0264553
	SA5	3L	3708563	lncRNA:CR45675	FBgn0267235
	SA5	3L	3893056	snRNA:U11	FBgn0083987
	SA5	3L	3896900	CG14977	FBgn0035469
	SA5	3L	3753693	ppk27	FBgn0035458
	SA5	3L	3412145	mir-2282	FBgn0262260
	SA5	3L	3626352	dar1	FBgn0263239
	SA5	3L	3522850	lncRNA:CR45043	FBgn0266403
	SA5	3L	3903492	Sc2	FBgn0035471
	SA5	3L	3809146	CG32262	FBgn0052262
	SA5	3L	3907852	mge	FBgn0035473
	SA5	3L	3515751	Eip63E	FBgn0005640	instar larval development; Stowers et al. 2000
	SA6	3R	5635901	CG31548	FBgn0051548
	SA6	3R	5862865	side-III	FBgn0083949
	SA6	3R	6267591	Osi11	FBgn0037418
	SA6	3R	5607275	Rga	FBgn0017550
	SA6	3R	6101958	lncRNA:CR44929	FBgn0266234
	SA6	3R	5474899	Hcs	FBgn0037332
	SA6	3R	5552823	Pcmt	FBgn0086768
	SA6	3R	6377797	CG42537	FBgn0260645
	SA6	3R	5227289	Kat60	FBgn0040208
	SA6	3R	5655139	MED27	FBgn0037359
	SA6	3R	5680054	Rab23	FBgn0037364	starvation resistance candidate; Sørensen et al. 2007
	SA6	3R	5458563	PEK	FBgn0037327
	SA6	3R	6389162	Dmtn	FBgn0037443
	SA6	3R	6088799	Gasp	FBgn0026077
	SA6	3R	6457088	Zif	FBgn0037446
	SA6	3R	5791879	CG1218	FBgn0037377
	SA6	3R	5969983	lncRNA:CR44926	FBgn0266231
	SA6	3R	5824615	dgrn	FBgn0037384
	SA6	3R	5598638	snoRNA:Psi28S-2442a	FBgn0082989
	SA6	3R	5596201	snoRNA:Psi28S-3385b	FBgn0082961
	SA6	3R	5378093	kkv	FBgn0001311
	SA6	3R	5226158	Vps37B	FBgn0037299
	SA6	3R	5724047	lncRNA:CR44924	FBgn0266229
	SA6	3R	6227512	Osi5	FBgn0037413
	SA6	3R	5742510	Madm	FBgn0027497
	SA6	3R	6343002	CG10298	FBgn0037432
	SA6	3R	5754932	Sec8	FBgn0266672
	SA6	3R	6076804	Or83c	FBgn0037399
	SA6	3R	5625367	snoRNA:Me28S-U2134a	FBgn0086051
	SA6	3R	5386717	CG14668	FBgn0037320
	SA6	3R	5478390	ksr	FBgn0015402
	SA6	3R	4984498	lncRNA:CR43424	FBgn0263343
	SA6	3R	5170004	cno	FBgn0259212
	SA6	3R	5400594	CG2663	FBgn0037323
	SA6	3R	5568921	Rheb	FBgn0041191	response to starvation; Saucedo et al. 2003; lipid metabolic process; Murillo-Maldonado et al. 2011; carbohydrate metabolic process; Murillo-Maldonado et al. 2011
	SA6	3R	5270116	mtd	FBgn0013576
	SA6	3R	6173549	Osi1	FBgn0037406
	SA6	3R	6478311	CG15186	FBgn0037448
	SA6	3R	6305247	Osi16	FBgn0051561
	SA6	3R	5665139	Xe7	FBgn0010772
	SA6	3R	5595364	kra	FBgn0250753
	SA6	3R	5425369	CG12147	FBgn0037325
	SA6	3R	5649065	Sec23	FBgn0262125
	SA6	3R	5853332	CG34287	FBgn0085316
	SA6	3R	6341968	CG17917	FBgn0037431
	SA6	3R	5195004	snRNA:U4atac	FBgn0263018
	SA6	3R	5557663	Pi4KIIalpha	FBgn0037339
	SA6	3R	5376780	7B2	FBgn0041707
	SA6	3R	5622119	CG2911	FBgn0037350
	SA6	3R	5375022	CG14667	FBgn0037317
	SA6	3R	6345000	SmD2	FBgn0261789
	SA6	3R	4981999	CG14662	FBgn0037291
	SA6	3R	6127229	lncRNA:CR43487	FBgn0263498
	SA6	3R	5976177	Obp83b	FBgn0010403
	SA6	3R	5712975	cas	FBgn0004878
	SA6	3R	5690891	CG2104	FBgn0037365
	SA6	3R	5240014	CG33293	FBgn0053293
	SA6	3R	5847220	CG14676	FBgn0037388
	SA6	3R	5781762	kat-60L1	FBgn0037375
	SA6	3R	5355092	CG1161	FBgn0037313
	SA6	3R	6291737	Osi13	FBgn0037422
	SA6	3R	6260211	Osi9	FBgn0037416
	SA6	3R	5137057	CG12589	FBgn0040684
	SA6	3R	5465630	RpL35A	FBgn0037328
	SA6	3R	5275678	CG31538	FBgn0051538
	SA6	3R	5794705	CG10979	FBgn0037379
	SA6	3R	5734698	CG2100	FBgn0037369
	SA6	3R	5269081	CR45033	FBgn0266393
	SA6	3R	5522299	CG43845	FBgn0264427
	SA6	3R	5588873	rev7	FBgn0037345
	SA6	3R	6299128	Osi14	FBgn0040279
	SA6	3R	6330248	Osi18	FBgn0037428
	SA6	3R	5263757	lncRNA:CR45793	FBgn0267443
	SA6	3R	6311772	Osi17	FBgn0037427
	SA6	3R	5738178	Sym	FBgn0037371
	SA6	3R	5616644	Spec2	FBgn0044823
	SA6	3R	5659477	asRNA:CR44093	FBgn0264902
	SA6	3R	5368481	lncRNA:CR44103	FBgn0264912
	SA6	3R	5300145	Tim17b1	FBgn0037310
	SA6	3R	5831639	CG1208	FBgn0037386
	SA6	3R	6025826	CG11459	FBgn0037396
	SA6	3R	6380467	TfIIFalpha	FBgn0010282
	SA6	3R	5627852	CG31551	FBgn0051551
	SA6	3R	6449944	CG9727	FBgn0037445
	SA6	3R	5128087	CG12007	FBgn0037293
	SA6	3R	5596360	snoRNA:Psi28S-3385a	FBgn0082962
	SA6	3R	5669713	dpr11	FBgn0037363	response to starvation; Zirin et al 2013
	SA6	3R	5221632	CG2604	FBgn0037298
	SA6	3R	6340095	Osi20	FBgn0037430
	SA6	3R	6215832	Osi3	FBgn0037411
	SA6	3R	6306884	CG46026	FBgn0267690
	SA6	3R	5890842	lncRNA:CR45761	FBgn0267399
	SA6	3R	5972155	Obp83a	FBgn0011281
	SA6	3R	5253153	CG1113	FBgn0037304
	SA6	3R	5662901	asRNA:CR46134	FBgn0267809
	SA6	3R	6234708	Osi6	FBgn0027527
	SA6	3R	6371026	CRAT	FBgn0037440
	SA6	3R	5236092	rtp	FBgn0087005
	SA6	3R	5758680	CG2082	FBgn0027608
	SA6	3R	5469463	mRpL44	FBgn0037330
	SA6	3R	6255175	Osi8	FBgn0037415
	SA6	3R	5563977	CG14671	FBgn0037340
	SA6	3R	6368965	CG10286	FBgn0037439
	SA6	3R	5258336	Tim17a2	FBgn0037307
	SA6	3R	5960294	CG11373	FBgn0040679
	SA6	3R	5232543	Mms19	FBgn0037301	starvation resistance candidate; Sørensen et al. 2007
	SA6	3R	5609245	sisRNA:1	FBgn0285959
	SA6	3R	5613358	Atu	FBgn0019637
	SA6	3R	6187315	NPFR	FBgn0037408	larval feeding behavior; Wu et al. 2005
	SA6	3R	5613280	asRNA:CR46135	FBgn0267810
	SA6	3R	6108134	Obp83cd	FBgn0046878
	SA6	3R	5802328	CG11000	FBgn0263353
	SA6	3R	6529169	dpr11	FBgn0053202
	SA6	3R	5472810	HDAC3	FBgn0025825
	SA6	3R	5369540	CG31542	FBgn0051542
	SA6	3R	5042652	lncRNA:CR46352	FBgn0286032
	SA6	3R	5589601	noi	FBgn0014366
	SA6	3R	5224139	CG14664	FBgn0040682
	SA6	3R	6375359	snoRNA:83E4-5	FBgn0261006
	SA6	3R	5217751	Prosbeta2R2	FBgn0037296
	SA6	3R	5472810	CG45100	FBgn0266539
	SA6	3R	6000426	Rm62	FBgn0003261
	SA6	3R	6468437	Neurochondrin	FBgn0037447
	SA6	3R	6346111	CG18048	FBgn0037435
	SA6	3R	5053181	lncRNA:CR45588	FBgn0267148
	SA6	3R	5489505	NKCC	FBgn0051547
	SA6	3R	5835478	asRNA:CR45192	FBgn0266702
	SA6	3R	5652640	elm	FBgn0037358
	SA6	3R	5970760	lncRNA:TS20	FBgn0284417
	SA6	3R	5358873	Cerk	FBgn0037315
	SA6	3R	5753318	CG2091	FBgn0037372
	SA6	3R	5237651	CG12163	FBgn0260462
	SA6	3R	4986500	plh	FBgn0037292
	SA6	3R	5467778	POLDIP2	FBgn0037329
	SA6	3R	6054712	CG15580	FBgn0037398
	SA6	3R	5625178	snoRNA:Me28S-U2134b	FBgn0260002
	SA6	3R	5357012	Prosbeta7	FBgn0250746
	SA6	3R	5508842	Nmdar1	FBgn0010399
	SA6	3R	6350896	Pak	FBgn0267698
	SA6	3R	6496039	tRNA:Met-CAT-1-5	FBgn0011919
	SA6	3R	5787337	Hat1	FBgn0037376
	SA6	3R	5789493	Rpn5	FBgn0028690
	SA6	3R	5634626	CG31546	FBgn0051546
	SA6	3R	5822026	CG2023	FBgn0037383	starvation resistance candidate; Sørensen et al. 2007
	SA6	3R	5914316	lncRNA:CR45762	FBgn0267400
	SA6	3R	6527508	CG15185	FBgn0037449
	SA6	3R	5567502	CG2931	FBgn0037342
	SA6	3R	5077779	corto	FBgn0010313	starvation resistance candidate; Sørensen et al. 2007
	SA6	3R	6111671	Obp83g	FBgn0046875
	SA6	3R	6218318	Osi4	FBgn0037412
	SA6	3R	5685855	plx	FBgn0261261
	SA6	3R	5656236	CG2182	FBgn0037360
	SA6	3R	6053028	lncRNA:CR44921	FBgn0266226
	SA6	3R	5994791	lncRNA:CR44928	FBgn0266233
	SA6	3R	6184455	CR31562	FBgn0051562
	SA6	3R	5517117	Itp-r83A	FBgn0010051	response to starvation; Subramanian et al. 2013; regulation of feeding behavior; Subramanian et al. 2013; larval feeding behavior; Agrawal et al. 2009; fatty acid homeostasis; Subramanian et al. 2013
	SA6	3R	5596526	snoRNA:Psi28S-3091b	FBgn0082978
	SA6	3R	5830062	glob3	FBgn0037385
	SA6	3R	5393922	CG1172	FBgn0264712
	SA6	3R	5849697	disp	FBgn0029088
	SA6	3R	5813609	CG42675	FBgn0261561
	SA6	3R	6037787	lncRNA:CR46221	FBgn0267941
	SA6	3R	5858083	CG2017	FBgn0037391
	SA6	3R	6027767	CR1075	FBgn0037397
	SA6	3R	5821972	CG46303	FBgn0284081
	SA6	3R	6408978	lncRNA:CR44017	FBgn0264787
	SA6	3R	6263976	Osi10	FBgn0037417
	SA6	3R	5579301	CG2926	FBgn0037344	starvation resistance candidate; Sørensen et al. 2007
	SA6	3R	5841170	CG1213	FBgn0037387
	SA6	3R	4982265	asRNA:CR43478	FBgn0263455
	SA6	3R	6374475	CG42564	FBgn0260766
	SA6	3R	6382914	godzilla	FBgn0037442
	SA6	3R	5108678	CG43131	FBgn0262605
	SA6	3R	6344029	CG17919	FBgn0037433
	SA6	3R	5624474	RpL13A	FBgn0037351
	SA6	3R	5632192	CG31549	FBgn0051549
	SA6	3R	5598423	snoRNA:Psi28S-2442b	FBgn0082988
	SA6	3R	6284462	CG15597	FBgn0037420
	SA6	3R	6451551	mir-9375	FBgn0283558
	SA6	3R	5856585	ECSIT	FBgn0028436
	SA6	3R	6287733	CG15594	FBgn0037421
	SA6	3R	5159612	CG12590	FBgn0037294
	SA6	3R	5548115	mia	FBgn0014342
	SA6	3R	5255444	CG12173	FBgn0037305
	SA6	3R	5372592	hd	FBgn0086695
	SA6	3R	5607799	asRNA:ASTR	FBgn0263619
	SA6	3R	5793308	CG2046	FBgn0037378
	SA6	3R	6361672	CG42724	FBgn0261641
	SA6	3R	5596697	snoRNA:Psi28S-3091a	FBgn0082979
	SA6	3R	5414527	CG14669	FBgn0037326
	SA6	3R	5603236	asl	FBgn0261004
	SA6	3R	5818794	Hpr1	FBgn0037382
	SA6	3R	5353717	CG11999	FBgn0037312
	SA6	3R	5779315	jagn	FBgn0037374
	SA6	3R	6209373	Osi2	FBgn0037410
	SA6	3R	6377349	CG1024	FBgn0027514
	SA6	3R	5601433	CG1427	FBgn0037347
	SA6	3R	5571108	CRMP	FBgn0023023
	SA6	3R	6122592	Vha14-2	FBgn0037402
	SA6	3R	5371795	RpII18	FBgn0003275
	SA6	3R	5485543	CG31550	FBgn0051550
	SA6	3R	5736748	CG1236	FBgn0037370
	SA6	3R	5638655	MTA1-like	FBgn0027951
	SA6	3R	6309976	CG31560	FBgn0051560
	SA6	3R	5555084	Snm1	FBgn0037338
	SA6	3R	5591763	Vha26	FBgn0283535
	SA6	3R	5369540	CG34277	FBgn0085306
	SA6	3R	6335362	Osi19	FBgn0037429
	SA6	3R	5660635	Wdr33	FBgn0046222
	SA6	3R	5397643	Or83a	FBgn0037322
	SA6	3R	6248994	Osi7	FBgn0037414
	SA6	3R	5564865	CG12746	FBgn0037341
	SA6	3R	5250913	asRNA:CR44019	FBgn0264789
	SA6	3R	6109642	Obp83ef	FBgn0046876
	SA6	3R	5597596	snoRNA:Psi28S-3571	FBgn0082954
	SA6	3R	6406855	gpp	FBgn0264495
	SA6	3R	5560472	asRNA:CR46136	FBgn0267811
	SA6	3R	5848953	CR10991	FBgn0037389
	SA6	3R	6349243	Hr83	FBgn0037436
	SA6	3R	6301804	Osi15	FBgn0037424
	SA6	3R	5150908	dpr16	FBgn0037295
	SA6	3R	5733513	CG1239	FBgn0037368
	SA6	3R	5539510	CG2519	FBgn0037336
	SA6	3R	4965445	CG1124	FBgn0037290	circadian rhythm; Gaudet et al. 2010
	SA6	3R	6278531	Osi12	FBgn0037419
	SA6	3R	5633627	CG12171	FBgn0037354	starvation resistance candidate; Sørensen et al. 2007
	SA6	3R	5470926	Snr1	FBgn0011715
	SA6	3R	6167483	CG1077	FBgn0037405
	SA6	3R	5407183	Orco	FBgn0037324
	SA6	3R	5989227	lncRNA:CR44927	FBgn0266232
	SA6	3R	5219657	CG1116	FBgn0037297
	SA6	3R	5388228	tRNA:Arg-TCG-4-1	FBgn0011965
	SA6	3R	6150116	CG31559	FBgn0051559
	SA6	3R	5637234	CG12170	FBgn0037356
	SA6	3R	5257037	Hph	FBgn0264785
	SA6	3R	5965806	lncRNA:CR44925	FBgn0266230
	SA6	3R	6126476	lncRNA:CR43486	FBgn0263497
	SA6	3R	5858195	asRNA:CR46133	FBgn0267808
	SA6	3R	6010573	CG10280	FBgn0037395
	SA6	3R	6198811	Osi24	FBgn0037409
	SA6	3R	5559878	snoRNA:Pi4KIIalpha-a	FBgn0263484
	SA6	3R	5045207	lncRNA:CR43635	FBgn0263626
	SA6	3R	5015624	lncRNA:CR45585	FBgn0267145
	SA6	3R	5598015	snoRNA:Psi28S-3186	FBgn0086662
Panel/Trait	QTL	Chromosome	Position	Gene Symbol	FlyBase ID	Association with Starvation-Related Trait
pA Male Starvation Resistance	SA1	2L	454754	CR43080	FBgn0262510
	SA1	2L	602813	CG13689	FBgn0031270
	SA1	2L	473013	MED15	FBgn0027592
	SA1	2L	553742	rempA	FBgn0260933
	SA1	2L	625652	CG2839	FBgn0031273
	SA1	2L	500873	lncRNA:CR46259	FBgn0267992
	SA1	2L	574291	cold	FBgn0031268
	SA1	2L	455531	CG4133	FBgn0031257
	SA1	2L	544925	Ets21C	FBgn0005660
	SA1	2L	378112	al	FBgn0000061
	SA1	2L	624617	lectin-21Ca	FBgn0040107
	SA1	2L	564163	CG2794	FBgn0031265
	SA1	2L	419952	RpLP1	FBgn0002593
	SA1	2L	623107	lncRNA:CR44797	FBgn0266032
	SA1	2L	415067	ebi	FBgn0263933
	SA1	2L	588048	lncRNA:CR46148	FBgn0267827
	SA1	2L	490835	lncRNA:CR46258	FBgn0267991
	SA1	2L	573033	Ipk2	FBgn0031267
	SA1	2L	628729	lncRNA:CR45369	FBgn0266909
	SA1	2L	355565	Ent1	FBgn0031250
	SA1	2L	404285	RpI135	FBgn0003278
	SA1	2L	545129	nAChRbeta3	FBgn0031261
	SA1	2L	560568	CG11835	FBgn0031264
	SA1	2L	559612	Tspo	FBgn0031263	determination of adult lifespan; Lin et al. 2014
	SA1	2L	583540	Gsc	FBgn0010323
	SA1	2L	605914	lncRNA:CR43648	FBgn0263657
	SA1	2L	408030	AP-2alpha	FBgn0264855
	SA1	2L	439539	lncRNA:CR43717	FBgn0263870
	SA1	2L	568340	Sf3b1	FBgn0031266
	SA1	2L	577486	Pph13	FBgn0023489
	SA1	2L	396595	CG4213	FBgn0031251
	SA1	2L	476446	cbt	FBgn0043364
	SA1	2L	418434	CG13690	FBgn0031252
	SA1	2L	623900	lncRNA:CR44798	FBgn0266033
	SA1	2L	422873	BBS8	FBgn0031255
	SA1	2L	448254	crq	FBgn0015924
	SA1	2L	620298	lectin-21Cb	FBgn0040106
	SA1	2L	355663	asRNA:CR45367	FBgn0266907
	SA1	2L	396120	lncRNA:CR43718	FBgn0263871
	SA1	2L	458876	CG4297	FBgn0031258
	SA1	2L	542786	Spp	FBgn0031260
	SA1	2L	431227	ex	FBgn0004583	starvation resistance candidate; Sørensen et al. 2007
	SA1	2L	566366	Nle	FBgn0021874
	SA1	2L	476220	ush	FBgn0003963
	SA1	2L	305935	Plc21C	FBgn0004611	lipid metabolic process; FlyBase Curators et al. 2004; entrainment of circadian clock by photoperiod; Ni et al. 2017
	SA1	2L	453108	shv	FBgn0031256
	SA1	2L	540599	lwr	FBgn0010602
	SA1	2L	608340	lncRNA:CR43649	FBgn0263658
	SA1	2L	357329	asRNA:CR45366	FBgn0266906
	SA1	2L	421771	CG13692	FBgn0031254
	SA1	2L	420895	CG11885	FBgn0031253
	SA1	2L	575711	Ptth	FBgn0013323
	SA2	2R	9240041	Cyp4p1	FBgn0015037
	SA2	2R	9587953	clos	FBgn0261016
	SA2	2R	9095685	snoRNA:Or-aca5	FBgn0086672
	SA2	2R	9578905	lncRNA:CR46257	FBgn0267990
	SA2	2R	9661225	tRNA:iMet-CAT-2-1	FBgn0011921
	SA2	2R	9260278	CG34141	FBgn0083977
	SA2	2R	9087834	Dbp45A	FBgn0010220
	SA2	2R	9395330	CG8800	FBgn0033408
	SA2	2R	9566146	Not1	FBgn0085436
	SA2	2R	9446046	Camta	FBgn0259234
	SA2	2R	9019032	CG8170	FBgn0033365
	SA2	2R	9541947	CG1888	FBgn0033421
	SA2	2R	9599909	CG30340	FBgn0050340
	SA2	2R	9601431	CG30339	FBgn0050339
	SA2	2R	9039728	Ance-4	FBgn0033366
	SA2	2R	9096237	snoRNA:Me28S-A982a	FBgn0082943
	SA2	2R	9605988	GstT1	FBgn0050000
	SA2	2R	9195205	unpg	FBgn0015561
	SA2	2R	9552844	lncRNA:CR43651	FBgn0263660
	SA2	2R	9122125	GstE13	FBgn0033381
	SA2	2R	9636996	lncRNA:CR44070	FBgn0264879
	SA2	2R	9291856	Drep2	FBgn0028408
	SA2	2R	9017815	CG13747	FBgn0033364
	SA2	2R	9302823	Myd88	FBgn0033402
	SA2	2R	9561638	CG1809	FBgn0033423
	SA2	2R	9310329	lncRNA:CR45918	FBgn0267578
	SA2	2R	9400531	wun	FBgn0016078
	SA2	2R	9138486	CG8788	FBgn0028955
	SA2	2R	9286827	CG1968	FBgn0033401
	SA2	2R	9214095	lncRNA:CR44451	FBgn0265644
	SA2	2R	9503765	brp	FBgn0259246	adult locomotor behavior; Wagh et al. 2006
	SA2	2R	9116122	Su(var)2-10	FBgn0003612
	SA2	2R	9424087	prel	FBgn0033413
	SA2	2R	8992945	Np	FBgn0265011
	SA2	2R	9399080	l(2)k10201	FBgn0016970
	SA2	2R	9096931	CG8078	FBgn0033375
	SA2	2R	9577427	CG1814	FBgn0033426
	SA2	2R	9586110	CG12929	FBgn0033429
	SA2	2R	9453409	CG33758	FBgn0053758
	SA2	2R	9082395	CNT1	FBgn0033371
	SA2	2R	9044850	CG13743	FBgn0033368	starvation resistance candidate; Harbison et al. 2005
	SA2	2R	9103238	Vang	FBgn0015838
	SA2	2R	9114274	Phax	FBgn0033380
	SA2	2R	9161484	lncRNA:CR44283	FBgn0265310
	SA2	2R	9237512	Cyp4p2	FBgn0033395	sleep; Thimgan et al. 2015
	SA2	2R	9309296	CG13739	FBgn0033403
	SA2	2R	9584643	Updo	FBgn0033428
	SA2	2R	9454297	CG33757	FBgn0053757
	SA2	2R	9608128	CG12926	FBgn0033437
	SA2	2R	9095996	snoRNA:Me28S-G3255a	FBgn0082928
	SA2	2R	9621234	mir-307b	FBgn0262172
	SA2	2R	9362574	CG12158	FBgn0040775
	SA2	2R	9587193	RpL31	FBgn0285949
	SA2	2R	9186670	CG8026	FBgn0033391
	SA2	2R	9559255	asRNA:CR45281	FBgn0266819
	SA2	2R	9062295	ana	FBgn0011746	starvation resistance candidate: Harbison et al. 2005
	SA2	2R	9204410	CG8027	FBgn0033392
	SA2	2R	9494166	Wnt2	FBgn0004360
	SA2	2R	9107151	Pmm45A	FBgn0033377	carbohydrate metabolic process; FlyBase Curators et al. 2004
	SA2	2R	9345349	Or45a	FBgn0033404
	SA2	2R	9111505	Mys45A	FBgn0033379
	SA2	2R	9084598	CG13742	FBgn0033372
	SA2	2R	9162037	CG8046	FBgn0033388
	SA2	2R	9242320	Cyp4p3	FBgn0033397
	SA2	2R	9421972	CG13955	FBgn0033412
	SA2	2R	9610464	asRNA:CR44069	FBgn0264878
	SA2	2R	9167763	Rme-8	FBgn0015477
	SA2	2R	9611139	Mmp2	FBgn0033438	adult fat body development; Jia et al. 2014
	SA2	2R	9042261	PPO2	FBgn0033367
	SA2	2R	9183395	lncRNA:CR44284	FBgn0265311
	SA2	2R	9553762	mir-14	FBgn0262447	response to starvation; Varghese et al. 2010; regulation of lipid metabolic process; Xu et al. 2003; insulin like growth factor receptor signalling pathway; Varghese et al. 2010
	SA2	2R	9123304	CG18659	FBgn0027561
	SA2	2R	9157907	CG8008	FBgn0033387
	SA2	2R	9060461	CG8197	FBgn0033369
	SA2	2R	9434669	ced-6	FBgn0029092
	SA2	2R	9227785	hig	FBgn0010114
	SA2	2R	9186670	CG45085	FBgn0266486
	SA2	2R	9396265	Non1	FBgn0028473
	SA2	2R	9426439	Pdk	FBgn0017558
	SA2	2R	9092506	CG13741	FBgn0033374
	SA2	2R	9096763	snoRNA:Me28S-G3255b	FBgn0082927
	SA2	2R	9559598	Or45b	FBgn0033422
	SA2	2R	9095372	snoRNA:Psi28S-2949	FBgn0082981
	SA2	2R	9590867	Map60	FBgn0010342
	SA2	2R	9165632	Rad51D	FBgn0033389
	SA2	2R	9089774	CG8080	FBgn0033373
	SA2	2R	9143956	Prp38	FBgn0050342
	SA2	2R	9110799	tsu	FBgn0033378
	SA2	2R	9445444	lncRNA:CR45321	FBgn0266860
	SA2	2R	9313023	mir-987	FBgn0262220
	SA2	2R	9285310	CG2063	FBgn0033400
	SA2	2R	9399753	CG33774	FBgn0053774
	SA2	2R	9138486	CG44286	FBgn0265313
	SA2	2R	9132480	Hydr1	FBgn0033382	cellular lipid metabolic process; Gaudet et al. 2010; lipid metabolic process; Wisotzkey et al. 2003
	SA2	2R	9284845	asRNA:CR45132	FBgn0266625
	SA2	2R	9589050	CG1827	FBgn0033431
	SA2	2R	9098539	CG8777	FBgn0033376
	SA2	2R	9142146	shrb	FBgn0086656
	SA2	2R	9014368	CG13744	FBgn0033363
	SA2	2R	9096506	snoRNA:Me28S-A982b	FBgn0082942
	SA2	2R	9252021	CG30343	FBgn0050343
	SA2	2R	9007234	CG8172	FBgn0033362
	SA2	2R	9166566	CG42382	FBgn0259728
	SA2	2R	9288957	Mad1	FBgn0026326
	SA2	2R	9621251	mir-307a	FBgn0262385
	SA2	2R	9688289	Uba1	FBgn0023143	lipid storage; Beller et al. 2008; glucose homeostasis; Ugrankar et al. 2015
	SA2	2R	9390165	l(2)03659	FBgn0010549
	SA2	2R	9075158	asRNA:CR45924	FBgn0267586
	SA2	2R	9252310	Pkn	FBgn0020621
	SA2	2R	9213125	lncRNA:CR45309	FBgn0266847
	SA2	2R	8969346	CG8213	FBgn0033359
	SA2	2R	9207561	VhaAC45	FBgn0262515
	SA2	2R	9414342	wun2	FBgn0041087
	SA2	2R	9078721	CNT2	FBgn0025709
	SA2	2R	9095273	Uhg4	FBgn0083124
	SA2	2R	9145260	CG30344	FBgn0050344
	SA2	2R	9148689	CG30345	FBgn0050345
	SA2	2R	9594045	CG30338	FBgn0050338
	SA2	2R	9581761	Smyd4-1	FBgn0033427
	SA2	2R	9594045	CG1902	FBgn0033434
	SA2	2R	9309296	CG13954	FBgn0033405
	SA2	2R	9177864	Rab32	FBgn0002567	regulation of lipid storage; Wang et al. 2012
	SA2	2R	9135375	alc	FBgn0260972
	SA2	2R	9097030	snoRNA:Or-CD2	FBgn0086603
	SA2	2R	9605639	lncRNA:CR44285	FBgn0265312
	SA2	2R	9607292	GstT2	FBgn0050005
	SA7	3R	19908403	lncRNA:CR45048	FBgn0266408
	SA7	3R	19840845	CG31459	FBgn0051459
	SA7	3R	19853908	Ire1	FBgn0261984
	SA7	3R	19781246	CG11407	FBgn0038733	sleep; Thimgan et al. 2015
	SA7	3R	19794073	bnl	FBgn0014135
	SA7	3R	19875974	CG17186	FBgn0038741
	SA7	3R	19877737	Arc42	FBgn0038742	starvation resistance candidate; Sørensen et al. 2007
	SA7	3R	19879719	Ask1	FBgn0014006
	SA7	3R	19972898	CG31213	FBgn0051213	lipid transport; Gaudet et al. 2010
	SA7	3R	20011776	CG17190	FBgn0038761
	SA7	3R	19897372	CG4538	FBgn0038745
	SA7	3R	19802690	tRNA:Thr-AGT-1-7	FBgn0051471
	SA7	3R	19890689	CG4733	FBgn0038744
	SA7	3R	19931799	mira	FBgn0021776
	SA7	3R	19783522	CG11453	FBgn0038734
	SA7	3R	19907681	lncRNA:CR45047	FBgn0266407
	SA7	3R	19915868	CG4465	FBgn0038750
	SA7	3R	19864496	CG4686	FBgn0038739
	SA7	3R	19921313	lncRNA:CR46040	FBgn0267707
	SA7	3R	20026487	CG4424	FBgn0038765
	SA7	3R	20033881	CG10889	FBgn0038769
	SA7	3R	19905164	RhoGAP92B	FBgn0038747
	SA7	3R	19929277	Hs6st	FBgn0038755
	SA7	3R	20013872	CG4836	FBgn0270925
	SA7	3R	19743789	lncRNA:CR43488	FBgn0263499
	SA7	3R	19861610	CG11447	FBgn0038737
	SA7	3R	19920708	hpRNA:1	FBgn0285966
	SA7	3R	19948443	CG4783	FBgn0038756
	SA7	3R	19886255	ninaE	FBgn0002940	adult locomotory behavior; Pick and Strauss 2005
	SA7	3R	19914320	Xport-B	FBgn0260234
	SA7	3R	19921744	CG4462	FBgn0038752
	SA7	3R	20031823	CG4936	FBgn0038768
	SA7	3R	19918507	CG4770	FBgn0038751
	SA7	3R	19790972	tRNA:Ala-AGC-2-11	FBgn0051215
	SA7	3R	20021704	psidin	FBgn0243511
	SA7	3R	19920597	lncRNA:CR43282	FBgn0262971
	SA7	3R	19778750	CG11391	FBgn0038732
	SA7	3R	19775459	CG11659	FBgn0038731
	SA7	3R	19941997	lncRNA:CR46042	FBgn0267709
	SA7	3R	20029560	trem	FBgn0038767
	SA7	3R	19865417	CG4562	FBgn0038740
	SA7	3R	20008947	MED25	FBgn0038760
	SA7	3R	19926322	CG4459	FBgn0038753
	SA7	3R	20028058	CG4854	FBgn0038766
	SA7	3R	19730715	GluClalpha	FBgn0024963
	SA7	3R	19771382	CG6300	FBgn0038730
	SA7	3R	19847311	CG4662	FBgn0038735
	SA7	3R	20018269	PIG-L	FBgn0038763
	SA7	3R	19790122	tRNA:Val-CAC-2-6	FBgn0012004
	SA7	3R	19914396	Xport-A	FBgn0038749
	SA7	3R	19862517	CG4572	FBgn0038738
	SA7	3R	19903665	Surf6	FBgn0038746
	SA8	3R	25268661	CR13656	FBgn0039307
	SA8	3R	25314494	CG10559	FBgn0039323
	SA8	3R	25266813	asRNA:CR45214	FBgn0266741
	SA8	3R	25618414	CG5071	FBgn0039347
	SA8	3R	25611013	Npl4	FBgn0039348
	SA8	3R	25260963	CG10425	FBgn0039304
	SA8	3R	25397788	Muc96D	FBgn0051439
	SA8	3R	25316461	CG10553	FBgn0039324
	SA8	3R	25483098	CG42488	FBgn0259991
	SA8	3R	25650572	lncRNA:CR45917	FBgn0267577
	SA8	3R	25637843	jigr1	FBgn0039350
	SA8	3R	25651398	mir-92b	FBgn0262388
	SA8	3R	25624805	Ssadh	FBgn0039349
	SA8	3R	25306407	CG10550	FBgn0039321
	SA8	3R	25263267	GlnRS	FBgn0027090
	SA8	3R	25273837	CG11878	FBgn0039310
	SA8	3R	25505191	CG5107	FBgn0039342
	SA8	3R	25496078	lncRNA:CR44948	FBgn0266253
	SA8	3R	25335257	CG11902	FBgn0028647
	SA8	3R	25318550	CG10560	FBgn0039325
	SA8	3R	25502785	lncRNA:CR43457	FBgn0263411
	SA8	3R	25270209	CG11891	FBgn0039309
	SA8	3R	25287474	CG13658	FBgn0039315
	SA8	3R	25358285	ND-49L	FBgn0039331
	SA8	3R	25329530	CHKov2	FBgn0039328
	SA8	3R	25249348	Nup358	FBgn0039302
	SA8	3R	25613666	CG5079	FBgn0039346
	SA8	3R	25302464	CG31370	FBgn0051370
	SA8	3R	25383700	CG31437	FBgn0051437
	SA8	3R	25347431	Fur1	FBgn0004509
	SA8	3R	25344761	tobi	FBgn0261575	carbohydrate metabolic process; FlyBase Curators et al. 2004
	SA8	3R	25323156	CHKov1	FBgn0045761
	SA8	3R	25270209	CG11889	FBgn0039308
	SA8	3R	25262182	asRNA:CR46099	FBgn0267768
	SA8	3R	25265844	RIOK2	FBgn0039306
	SA8	3R	25516118	msi	FBgn0011666
	SA8	3R	25300891	CG13659	FBgn0039319
	SA8	3R	25262741	CG11858	FBgn0039305
	SA8	3R	25243039	bam	FBgn0000158
	SA8	3R	25591502	ymp	FBgn0261287
	SA8	3R	25473490	Vps33B	FBgn0039335
	SA8	3R	25491460	CG5112	FBgn0039341
	SA8	3R	25245955	RpS27	FBgn0039300
	SA8	3R	25291370	CG31098	FBgn0051098
	SA8	3R	25281548	CG11892	FBgn0039313
	SA8	3R	25304137	CG31436	FBgn0051436
	SA8	3R	25581223	CG4582	FBgn0039344	lipid catabolic process; FlyBase Curators 2008
	SA8	3R	25285473	CG31104	FBgn0051104
	SA8	3R	25491285	asRNA:CR44179	FBgn0265068
	SA8	3R	25653091	Tnks	FBgn0027508
	SA8	3R	25340252	rha	FBgn0027376
	SA8	3R	25258898	CG11857	FBgn0039303
	SA8	3R	25321053	CG10562	FBgn0039326
	SA8	3R	25268009	CR43310	FBgn0263002
	SA8	3R	25247658	Nup37	FBgn0039301
	SA8	3R	25289889	CG11893	FBgn0039316
	SA8	3R	25246874	CR46364	FBgn0286042
	SA8	3R	25483098	CG5116	FBgn0039339
	SA8	3R	25331363	CG10669	FBgn0039329
	SA8	3R	25501827	lncRNA:CR43456	FBgn0263410
	SA8	3R	25278427	CG10514	FBgn0039312
	SA8	3R	25275790	CG10513	FBgn0039311
	SA8	3R	25553703	lncRNA:CR46100	FBgn0267769
	SA8	3R	25311027	CG31087	FBgn0051087
	SA8	3R	25477868	XNP	FBgn0039338
	SA8	3R	25588859	mir-1000	FBgn0262319
	SA8	3R	25485618	Dhap-at	FBgn0040212	ether lipid biosynthesic process; Faust et al. 2012
	SA8	3R	25309429	CG31099	FBgn0051099
	SA8	3R	25283620	CG31300	FBgn0051300
	SA8	3R	25293458	CG31102	FBgn0051102
	SA8	3R	25646506	mir-92a	FBgn0262411
	SA8	3R	25297960	CG31288	FBgn0051288
	SA8	3R	25477003	MED28	FBgn0039337
	SA8	3R	25493481	CG33494	FBgn0053494
	SA8	3R	25296128	CG31097	FBgn0051097
	SA8	3R	25506275	CG5111	FBgn0039343
	SA8	3R	25503378	lncRNA:CR45651	FBgn0267211
	SA8	3R	25475636	CG4553	FBgn0039336
	SA8	3R	25381065	alrm	FBgn0039332
	SA8	3R	25586442	lncRNA:CR45910	FBgn0267570
Panel/Trait	QTL	Chromosome	Position	Gene Symbol	FlyBase ID	Association with Starvation-Related Trait
pB Female Starvation Resistance	SB1	2L	7174368	lncRNA:CR44610	FBgn0265821
	SB1	2L	7176037	lncRNA:CR46210	FBgn0267929
	SB1	2L	7177879	lncRNA:CR44613	FBgn0265824
	SB1	2L	7250607	CG13786	FBgn0031900
	SB1	2L	7094515	lncRNA:CR46196	FBgn0267915
	SB1	2L	7220567	asRNA:CR44989	FBgn0266324
	SB1	2L	7223328	Ndae1	FBgn0259111
	SB1	2L	7037823	milt	FBgn0262872
	SB1	2L	7098188	Pvf3	FBgn0085407
	SB1	2L	7056301	Mnn1	FBgn0031885	determination of adult lifespan; Cerrato et al. 2006
	SB1	2L	7232165	CG43800	FBgn0264344
	SB1	2L	7021682	Pcp	FBgn0003046
	SB1	2L	7185461	CG4496	FBgn0031894
	SB1	2L	7059214	CG31907	FBgn0051907
	SB1	2L	7030493	Rab30	FBgn0031882
	SB1	2L	7255419	Wnt4	FBgn0010453
	SB1	2L	7063986	Sem1	FBgn0266666
	SB1	2L	7204538	CG13784	FBgn0031897
	SB1	2L	7024829	CG31908	FBgn0051908
	SB1	2L	7032721	Caper	FBgn0031883
	SB1	2L	7027526	MME1	FBgn0031881
	SB1	2L	7078895	lncRNA:CR44611	FBgn0265822
	SB1	2L	7257512	CG31909	FBgn0051909
	SB1	2L	7182234	MICU1	FBgn0031893
	SB1	2L	7064431	Nuf2	FBgn0031886
	SB1	2L	7190431	CG4497	FBgn0031895
	SB1	2L	7014623	Gart	FBgn0000053
	SB1	2L	7069536	Pvf2	FBgn0031888
	SB1	2L	7194908	CG4502	FBgn0031896
	SB1	2L	7220369	mEFG1	FBgn0263133
	SB1	2L	7067983	CG11289	FBgn0031887
	SB1	2L	7142304	lncRNA:CR44612	FBgn0265823
	SB1	2L	7227734	CG43799	FBgn0264343
	SB3	2L	12172981	crok	FBgn0032421
	SB3	2L	12424904	CG6405	FBgn0032428
	SB3	2L	12431075	SC35	FBgn0265298	starvation resistance candidate; Sørensen et al. 2007
	SB3	2L	12175451	atilla	FBgn0032422
	SB3	2L	12343643	CG43813	FBgn0264361
	SB3	2L	12582402	lncRNA:CR44595	FBgn0265806
	SB3	2L	12170550	CG17217	FBgn0032419
	SB3	2L	12316272	lncRNA:CR45283	FBgn0266821
	SB3	2L	12428028	CG6388	FBgn0032430
	SB3	2L	12171204	CG6583	FBgn0032420
	SB3	2L	12138008	Gr33a	FBgn0032416
	SB3	2L	12451945	CG5418	FBgn0032436	starvation resistance candidate; Sørensen et al. 2007
	SB3	2L	12398274	Pkd2	FBgn0041195	larval feeding behavior; Gao et al. 2004
	SB3	2L	12338848	CG31862	FBgn0051862
	SB3	2L	12496616	t-cup	FBgn0051858
	SB3	2L	12453664	CR17024	FBgn0032437
	SB3	2L	12315777	lncRNA:CR45282	FBgn0266820
	SB3	2L	12455540	bun	FBgn0259176	determination of adult lifespan; Kim et al. 2009
	SB3	2L	12446080	CG5421	FBgn0032434
	SB3	2L	12507939	lncRNA:CR43051	FBgn0262353
	SB3	2L	12570672	lncRNA:CR44598	FBgn0265809
	SB3	2L	12207709	CG31759	FBgn0051759
	SB3	2L	12403270	vir-1	FBgn0043841
	SB3	2L	12441401	Oatp33Ea	FBgn0032433
	SB3	2L	12434452	eRF3	FBgn0020443
	SB3	2L	12426631	CG5446	FBgn0032429
	SB3	2L	12581445	lncRNA:CR44596	FBgn0265807
	SB3	2L	12433025	snoRNA:SC35-b	FBgn0263469
	SB3	2L	12543176	lncRNA:CR42746	FBgn0261709
	SB3	2L	12174090	lncRNA:CR43356	FBgn0263088
	SB3	2L	12432798	snoRNA:SC35-a	FBgn0263468
	SB3	2L	12142780	CG31760	FBgn0051760
	SB3	2L	12460004	mir-967	FBgn0262203
	SB3	2L	12448484	Oatp33Eb	FBgn0032435
	SB3	2L	12161767	CG31861	FBgn0051861
	SB3	2L	12344219	bru2	FBgn0262475
	SB3	2L	12571160	lncRNA:CR44597	FBgn0265808
	SB3	2L	12164241	ZnT33D	FBgn0051860
	SB3	2L	12587625	nub	FBgn0085424
	SB3	2L	12429827	CG5435	FBgn0032431
	SB3	2L	12508108	snoRNA:CG43051-a	FBgn0263458
	SB3	2L	12175004	bru1	FBgn0000114
	SB3	2L	12610517	Ref2	FBgn0032439
	SB3	2L	12356441	CG17010	FBgn0032424
	SB4	2R	6162197	tRNA:Asn-GTT-1-5	FBgn0011932
	SB4	2R	6047195	CG34211	FBgn0085240
	SB4	2R	6623832	CG33919	FBgn0053919
	SB4	2R	6169607	tRNA:Arg-ACG-1-3	FBgn0011956
	SB4	2R	6207219	CG17994	FBgn0033072
	SB4	2R	6042532	Tbce	FBgn0033055
	SB4	2R	6502006	jing	FBgn0086655
	SB4	2R	6660645	Dpit47	FBgn0266518
	SB4	2R	6675028	CG17266	FBgn0033089
	SB4	2R	5937400	lncRNA:CR44126	FBgn0264957
	SB4	2R	5671741	kune	FBgn0033032
	SB4	2R	6756296	CG3420	FBgn0033100
	SB4	2R	6173684	Cyp6w1	FBgn0033065
	SB4	2R	6225634	tomboy40	FBgn0033074
	SB4	2R	5957621	CG7882	FBgn0033047
	SB4	2R	5758065	CG7791	FBgn0033038
	SB4	2R	6179726	CG8343	FBgn0040502
	SB4	2R	5754517	l(2)09851	FBgn0022288
	SB4	2R	6197387	CG30432	FBgn0050432
	SB4	2R	6741899	phtf	FBgn0028579
	SB4	2R	5706202	ap	FBgn0267978
	SB4	2R	6164876	tRNA:Lys-CTT-1-3	FBgn0011888
	SB4	2R	6242004	Pld	FBgn0033075
	SB4	2R	5656406	Not3	FBgn0033029
	SB4	2R	5496674	CG30438	FBgn0050438
	SB4	2R	6721101	l(2)01289	FBgn0010482
	SB4	2R	6663395	lncRNA:CR45128	FBgn0266621
	SB4	2R	6161535	tRNA:Arg-ACG-1-2	FBgn0011957
	SB4	2R	6716342	Zip42C.1	FBgn0033096	adult locomotory behavior; Lang et al. 2012; determination of adult lifespan; Lang et al. 2012
	SB4	2R	6695114	Mob4	FBgn0259483
	SB4	2R	6190129	tRNA:Asn-GTT-1-7	FBgn0011935
	SB4	2R	5177965	Nipped-A	FBgn0053554
	SB4	2R	5981844	Src42A	FBgn0264959
	SB4	2R	6153186	tRNA:Asn-GTT-1-2	FBgn0011937
	SB4	2R	5253945	lncRNA:CR41443	FBgn0084008
	SB4	2R	6636512	Bap170	FBgn0042085
	SB4	2R	6677001	Tdc1	FBgn0259977
	SB4	2R	6020311	Strica	FBgn0033051
	SB4	2R	6532595	lncRNA:CR43905	FBgn0264506
	SB4	2R	6807626	SdhB	FBgn0014028
	SB4	2R	5697872	CG17337	FBgn0259979
	SB4	2R	6013910	Act42A	FBgn0000043
	SB4	2R	6171496	tRNA:Lys-CTT-1-5	FBgn0011890
	SB4	2R	6047170	asRNA:CR44130	FBgn0264961
	SB4	2R	6216197	lncRNA:CR44161	FBgn0265044
	SB4	2R	6809044	CG15237	FBgn0033104
	SB4	2R	6699695	CG45092	FBgn0266525
	SB4	2R	5663909	lncRNA:CR45472	FBgn0267028
	SB4	2R	6699695	CG3409	FBgn0033095
	SB4	2R	5350477	CG10395	FBgn0033019
	SB4	2R	5765180	scaRNA:PsiU2-35.45	FBgn0263479
	SB4	2R	6668150	CG15908	FBgn0033085
	SB4	2R	5893895	CG43366	FBgn0263109
	SB4	2R	6615752	CR46361	FBgn0286039
	SB4	2R	5363253	lncRNA:CR42646	FBgn0261429
	SB4	2R	5353994	COX4L	FBgn0033020
	SB4	2R	5653676	CG1344	FBgn0027507
	SB4	2R	5760862	Gp210	FBgn0266580
	SB4	2R	6670154	Hsepi	FBgn0033087
	SB4	2R	6076910	CG7849	FBgn0033060
	SB4	2R	6180926	CG11211	FBgn0033067
	SB4	2R	5795413	Tsp42A	FBgn0033042
	SB4	2R	5967397	lncRNA:CR44127	FBgn0264958
	SB4	2R	5969099	BubR1	FBgn0263855
	SB4	2R	6178584	tRNA:Arg-ACG-1-5	FBgn0011955
	SB4	2R	6508895	lncRNA:CR45127	FBgn0266620
	SB4	2R	5259004	d4	FBgn0033015
	SB4	2R	6214568	bin3	FBgn0263144
	SB4	2R	5413744	laccase2	FBgn0259247
	SB4	2R	6501032	lncRNA:CR46075	FBgn0267744
	SB4	2R	6026273	SCAP	FBgn0033052
	SB4	2R	6642418	Fmo-2	FBgn0033079
	SB4	2R	5339706	CG10465	FBgn0033017
	SB4	2R	6657326	sced	FBgn0013732
	SB4	2R	6080828	Ars2	FBgn0033062
	SB4	2R	5804712	dpr12	FBgn0085414
	SB4	2R	6166151	tRNA:Ile-AAT-1-1	FBgn0011880
	SB4	2R	5351717	CG30441	FBgn0050441
	SB4	2R	6682521	asRNA:CR44165	FBgn0265050
	SB4	2R	6153506	tRNA:Asn-GTT-1-3	FBgn0011936
	SB4	2R	6162681	tRNA:Lys-CTT-1-2	FBgn0011889
	SB4	2R	6662265	Adf1	FBgn0284249	larval locomotory behavior; Sokolowski 2001
	SB4	2R	5676750	scaf	FBgn0033033
	SB4	2R	6759715	Epac	FBgn0085421
	SB4	2R	6810011	ubl	FBgn0022224
	SB4	2R	6625242	Vha16-1	FBgn0262736
	SB4	2R	6142165	tRNA:Arg-ACG-1-1	FBgn0011958
	SB4	2R	6675822	CG9422	FBgn0033092
	SB4	2R	6036557	CG14591	FBgn0033054
	SB4	2R	6673604	PGAP3	FBgn0033088
	SB4	2R	6158597	lncRNA:CR43904	FBgn0264505
	SB4	2R	6684745	Tdc2	FBgn0050446	locomotroy behavior; Hardie et al. 2007; locomotory rhythm; Huang et al. 2013
	SB4	2R	6162519	tRNA:Asn-GTT-1-6	FBgn0011931
	SB4	2R	6746381	Mccc2	FBgn0042083
	SB4	2R	6648654	Debcl	FBgn0029131	cellular response to starvation; Hou et al. 2008
	SB4	2R	5702112	vlc	FBgn0259978
	SB4	2R	5668383	CG8245	FBgn0033031
	SB4	2R	5884894	lncRNA:CR44125	FBgn0264956
	SB4	2R	6209782	l(2)k14710	FBgn0021847
	SB4	2R	6811019	koi	FBgn0265003
	SB4	2R	6200853	eIF3f2	FBgn0033069
	SB4	2R	6152603	tRNA:Asn-GTT-1-1	FBgn0011938
	SB4	2R	6600044	CG15233	FBgn0033076
	SB4	2R	6017739	Pngl	FBgn0033050
	SB4	2R	5640915	CG11665	FBgn0033028
	SB4	2R	6718196	Zip42C.2	FBgn0033097
	SB4	2R	6681796	lncRNA:CR44164	FBgn0265049
	SB4	2R	6653217	Opbp	FBgn0050443
	SB4	2R	6049874	CG34212	FBgn0085241
	SB4	2R	6165984	tRNA:Lys-CTT-1-4	FBgn0011887
	SB4	2R	6190372	tRNA:Asn-GTT-1-8	FBgn0011934
	SB4	2R	6749227	Eb1	FBgn0027066	locomotory behavior; Elliott et al. 2005
	SB4	2R	6693430	CG3270	FBgn0033093
	SB4	2R	5957588	asRNA:CR46269	FBgn0278599
	SB4	2R	5307288	sxc	FBgn0261403	locomotory rhythm; Kaasik et al. 2013
	SB4	2R	6696739	Rab2	FBgn0014009
	SB4	2R	6068795	lncRNA:CR44131	FBgn0264980
	SB4	2R	6669024	CG9410	FBgn0033086
	SB4	2R	5774776	ZnT41F	FBgn0025693
	SB4	2R	6162023	tRNA:Asn-GTT-1-4	FBgn0011933
	SB4	2R	5757662	CG34200	FBgn0085229
	SB4	2R	6087873	EcR	FBgn0000546	cholesterol homeostasis; Danielsen et al. 2016; positive regulation of circadian sleep/wake cycle, sleep; Ishimoto and Kitamoto 2010; determination of adult lifespan; Simon et al. 2003; larval wandering behavior; Davis et al. 2005
	SB4	2R	6655463	geminin	FBgn0033081
	SB4	2R	6050949	CCHa2-R	FBgn0033058
	SB4	2R	6707163	mir-4975	FBgn0263518
	SB4	2R	6683186	CG15909	FBgn0033090
	SB4	2R	6779749	Cyp6a2	FBgn0000473	starvation resistance candidate; Harbison et al. 2005
	SB4	2R	5603587	Fis1	FBgn0039969
	SB4	2R	5791441	Or42a	FBgn0033041
	SB4	2R	5974857	mle	FBgn0002774	determination of adult lifespan; Fergestad et al. 2006
	SB4	2R	6707306	lncRNA:CR43611	FBgn0263586
	SB4	2R	6202725	CG30431	FBgn0050431
	SB4	2R	6171687	tRNA:Arg-ACG-1-4	FBgn0050316
	SB4	2R	5879196	CG44438	FBgn0265631
	SB4	2R	5960275	CG7881	FBgn0033048
	SB4	2R	5503437	TpnC4	FBgn0033027
	SB4	2R	5797195	Or42b	FBgn0033043
	SB4	2R	5608635	CG17508	FBgn0039970
	SB4	2R	6137303	CG14589	FBgn0033063
	SB4	2R	5360331	CG10417	FBgn0033021
	SB4	2R	6757601	CG9436	FBgn0033101
	SB4	2R	6181748	Ptr	FBgn0262867
	SB4	2R	6074471	l(2)k09848	FBgn0284246
	SB4	2R	6078641	SmydA-5	FBgn0033061
	SB4	2R	6633647	Trap1	FBgn0026761	starvation resistance candidate; Sørensen et al. 2007
	SB4	2R	6142372	tRNA:Lys-CTT-1-1	FBgn0011891
	SB4	2R	5468319	CG30440	FBgn0050440
	SB4	2R	6057357	CG7856	FBgn0033056
	SB5	3L	19140975	fz2	FBgn0016797
	SB5	3L	18979368	lncRNA:CR45689	FBgn0267249
	SB5	3L	19097999	CG14079	FBgn0036849
	SB5	3L	19423758	CR33255	FBgn0053255
	SB5	3L	19059400	CG3797	FBgn0036842	starvation resistance candidate; Sørensen et al. 2007
	SB5	3L	19050757	Acp76A	FBgn0015586
	SB5	3L	19294564	fal	FBgn0028380
	SB5	3L	19269351	CG14085	FBgn0036859
	SB5	3L	19269772	CG14088	FBgn0036858
	SB5	3L	19000985	SmydA-2	FBgn0036839
	SB5	3L	19387580	ms(3)76Ba	FBgn0036868
	SB5	3L	19099123	Gem2	FBgn0036850	adult locomotory behavior; Borg and Cauchi 2013
	SB5	3L	19239864	lncRNA:CR43892	FBgn0264484
	SB5	3L	19090583	lncRNA:CR45386	FBgn0266935
	SB5	3L	19266473	CG9629	FBgn0036857
	SB5	3L	19092670	MESR6	FBgn0036846
	SB5	3L	19294727	asRNA:CR46048	FBgn0267715
	SB5	3L	19052902	CG43407	FBgn0263326
	SB5	3L	19248529	lncRNA:CR46216	FBgn0267936
	SB5	3L	18950629	CG6836	FBgn0036834
	SB5	3L	19236360	CG33647	FBgn0053647
	SB5	3L	19281364	Gbs-76A	FBgn0036862
	SB5	3L	19105381	CG14082	FBgn0036851
	SB5	3L	19066155	Mkp3	FBgn0036844	starvation resistance candidate; Sørensen et al. 2007
	SB5	3L	19280120	CG14089	FBgn0036861
	SB5	3L	19424702	CR42838	FBgn0262027
	SB5	3L	19263766	CG9666	FBgn0036856
	SB5	3L	19255340	rept	FBgn0040075
	SB5	3L	19253290	mRpL21	FBgn0036853
	SB5	3L	19420390	hpRNA:CR32205	FBgn0052205
	SB5	3L	19275791	CG14086	FBgn0036860
	SB5	3L	18984961	CG14075	FBgn0036835
	SB5	3L	19096399	CG10424	FBgn0036848
	SB5	3L	19052302	lncRNA:CR44675	FBgn0265886
	SB5	3L	18988736	CG34256	FBgn0085285
	SB5	3L	19063165	Sfxn2	FBgn0036843
	SB5	3L	19033317	lncRNA:CR45940	FBgn0267602
	SB5	3L	18997875	CG3808	FBgn0036838	starvation resistance candidate; Sørensen et al. 2007
	SB5	3L	18990026	CG18135	FBgn0036837
	SB5	3L	19229061	lncRNA:CR43893	FBgn0264485
	SB5	3L	19262232	Max	FBgn0017578
	SB5	3L	19405539	lncRNA:CR43966	FBgn0264697
	SB5	3L	19183998	lncRNA:CR45941	FBgn0267603
	SB5	3L	18985905	CG11619	FBgn0036836
	SB5	3L	19261394	Bet1	FBgn0260857
	SB5	3L	19128450	Spn75F	FBgn0052203
	SB5	3L	19263766	CG42374	FBgn0259720
	SB5	3L	19340321	CG32206	FBgn0052206
	SB5	3L	19266061	CG45081	FBgn0266456
	SB5	3L	19298623	pip	FBgn0003089
	SB5	3L	19094890	CNPYb	FBgn0036847
	SB5	3L	19260040	asRNA:CR45210	FBgn0266737
	SB5	3L	19003741	nkd	FBgn0002945
	SB5	3L	19257282	nes	FBgn0026630	lipid modification; Steinhauer et al. 2009
	SB6	3R	13085478	lncRNA:CR44967	FBgn0266302
	SB6	3R	13264364	Su(var)3-7	FBgn0003598
	SB6	3R	13269137	TBC1D5	FBgn0038129
	SB6	3R	13049398	CG7966	FBgn0038115
	SB6	3R	13298768	CG8774	FBgn0038136
	SB6	3R	13302648	CG32473	FBgn0052473	starvation resistance candidate; Sørensen et al. 2007
	SB6	3R	13294748	CG8773	FBgn0038135
	SB6	3R	13208754	CG8483	FBgn0038126
	SB6	3R	13032528	ry	FBgn0003308	determination of adult lifespan; Simonsen et al. 2007
	SB6	3R	13318991	CG45080	FBgn0266455
	SB6	3R	13105070	lncRNA:CR46019	FBgn0267683
	SB6	3R	13369648	CheA87a	FBgn0038142
	SB6	3R	13260356	CG11686	FBgn0040551
	SB6	3R	13047731	CG31157	FBgn0051157
	SB6	3R	13373104	CG9813	FBgn0038143
	SB6	3R	13188519	CG14380	FBgn0038124
	SB6	3R	13044157	CG45122	FBgn0266615
	SB6	3R	13191599	CG8141	FBgn0038125
	SB6	3R	13361816	poly	FBgn0086371	insulin receptor signalling pathway; Bolukbasi et al. 2012
	SB6	3R	13219644	CG8476	FBgn0038127
	SB6	3R	13364938	Dic1	FBgn0027610
	SB6	3R	13222951	Ace	FBgn0000024
	SB6	3R	13121951	2mit	FBgn0260793
	SB6	3R	13370240	Lip3	FBgn0023495	lipid metabolic process; FlyBase Curators et al. 2004
	SB6	3R	13044759	Hsc70-2	FBgn0001217
	SB6	3R	13181304	CG8138	FBgn0038122
	SB6	3R	13338330	PK2-R1	FBgn0038140
	SB6	3R	13312855	CG44142	FBgn0264991
	SB6	3R	13086224	CG43063	FBgn0262365
	SB6	3R	13132429	lncRNA:CR45109	FBgn0266578
	SB6	3R	13185526	CG8508	FBgn0038123
	SB6	3R	13279721	CG8630	FBgn0038130	lipid metabolic process; FlyBase Curators et al. 2004
	SB6	3R	13329070	PK2-R2	FBgn0038139
	SB6	3R	13057755	sim	FBgn0004666
	SB6	3R	13290629	Osi22	FBgn0038133
	SB6	3R	13372630	CG34309	FBgn0259831
	SB6	3R	13040165	snk	FBgn0003450
	SB6	3R	13262733	Ravus	FBgn0038128
	SB6	3R	13303426	CG43208	FBgn0262844
	SB6	3R	13038375	CG11668	FBgn0038113
	SB6	3R	13292052	wntD	FBgn0038134
	SB6	3R	13088651	timeout	FBgn0038118	entrainment of circadian clock; Benna et al. 2010
	SB6	3R	13284946	CG15888	FBgn0038131
	SB6	3R	13052245	pic	FBgn0260962
	SB6	3R	13089242	CG34308	FBgn0085337
	SB6	3R	13287655	CG15887	FBgn0038132
	SB6	3R	13042050	CG11670	FBgn0038114
	SB6	3R	13353673	mthl12	FBgn0045442	response to starvation; UniProt Curators 2002; determination of adult lifespan; UniProt Curators 2002
	SB7	3R	29835610	CG42592	FBgn0260969
	SB7	3R	29877059	CG31038	FBgn0051038
	SB7	3R	29859041	CR31032	FBgn0051032
	SB7	3R	30243978	CG9733	FBgn0039759
	SB7	3R	29927255	CG15522	FBgn0039723
	SB7	3R	29908107	CG31036	FBgn0051036
	SB7	3R	29863299	snoRNA:Me28S-A2564	FBgn0065066
	SB7	3R	30049293	asRNA:CR44046	FBgn0264838
	SB7	3R	29922216	Jon99Ciii	FBgn0003357
	SB7	3R	30052514	CG7946	FBgn0039743
	SB7	3R	29995357	Sas-6	FBgn0039731
	SB7	3R	29861582	RpS8	FBgn0039713
	SB7	3R	29934582	eIF2Balpha	FBgn0039726
	SB7	3R	29827281	Atg16	FBgn0039705	cellular response to starvation; Zirin et al. 2013
	SB7	3R	29862626	snoRNA:Or-CD8	FBgn0086061
	SB7	3R	30054696	spn-A	FBgn0003479
	SB7	3R	29928701	alpha-Man-Ic	FBgn0051202
	SB7	3R	29819131	neo	FBgn0039704
	SB7	3R	30135008	asRNA:CR46082	FBgn0267751
	SB7	3R	30022842	Axn	FBgn0026597	response to starvation; Zhang et al. 2014
	SB7	3R	30185423	CG9747	FBgn0039754	lipid metabolic process; FlyBase Curators et al. 2004
	SB7	3R	30249583	CG34299	FBgn0085328
	SB7	3R	30237094	CG43448	FBgn0263402
	SB7	3R	29933287	CG42557	FBgn0260759
	SB7	3R	30035240	ZIPIC	FBgn0039740
	SB7	3R	30004785	Nlp	FBgn0016685
	SB7	3R	30241268	CG9737	FBgn0039758
	SB7	3R	30003681	Nph	FBgn0039735
	SB7	3R	30134856	AdoR	FBgn0039747	regulation of carbohydrate metabolic process; Zuberova et al. 2010
	SB7	3R	30125633	Ppi1	FBgn0051025
	SB7	3R	30056859	CG7950	FBgn0260468
	SB7	3R	29996961	CG15525	FBgn0039732
	SB7	3R	30046470	CG7943	FBgn0039741
	SB7	3R	30175786	CG1983	FBgn0039751
	SB7	3R	30216484	CecC	FBgn0000279
	SB7	3R	30206783	snoRNA:Psi28S-2149	FBgn0086664
	SB7	3R	29935978	Vps13B	FBgn0039727
	SB7	3R	29903240	CG15517	FBgn0039718
	SB7	3R	29930551	Cog7	FBgn0051040
	SB7	3R	29950796	TkR99D	FBgn0004622
	SB7	3R	30207156	snoRNA:Psi18S-1377d	FBgn0083048
	SB7	3R	29999795	CG34298	FBgn0085327
	SB7	3R	30106997	lncRNA:CR46112	FBgn0267781
	SB7	3R	30196360	CG9743	FBgn0039756	lipid metabolic process; FlyBase Curators et al. 2004
	SB7	3R	30129279	CG31029	FBgn0051029
	SB7	3R	30207493	snoRNA:Psi18S-1377b	FBgn0083050
	SB7	3R	30207322	snoRNA:Psi18S-1377c	FBgn0083049
	SB7	3R	29912991	Capa	FBgn0039722
	SB7	3R	30055957	CG15526	FBgn0039744
	SB7	3R	29914521	trp	FBgn0003861
	SB7	3R	30211527	Cec-Psi1	FBgn0000280
	SB7	3R	29905464	CG15515	FBgn0039719
	SB7	3R	30152059	CG15529	FBgn0039748
	SB7	3R	30305808	CG34300	FBgn0085329
	SB7	3R	30166631	CG31028	FBgn0051028
	SB7	3R	29854695	dgt1	FBgn0039710
	SB7	3R	30212156	CecA2	FBgn0000277
	SB7	3R	30210874	CecA1	FBgn0000276
	SB7	3R	29841657	Cad99C	FBgn0039709
	SB7	3R	29983426	CG7896	FBgn0039728
	SB7	3R	29835950	Prtl99C	FBgn0039707
	SB7	3R	30253182	CG18404	FBgn0039761
	SB7	3R	29993475	CG7903	FBgn0039730
	SB7	3R	30010476	CG7920	FBgn0039737
	SB7	3R	29997900	CG11504	FBgn0039733
	SB7	3R	29869365	CG34133	FBgn0083969
	SB7	3R	30206976	snoRNA:Psi18S-1377e	FBgn0083047
	SB7	3R	29991144	Acph-1	FBgn0000032
	SB7	3R	30039719	Sry-alpha	FBgn0003510
	SB7	3R	29860055	CG15514	FBgn0039712
	SB7	3R	29923754	Jon99Cii	FBgn0003356
	SB7	3R	30056859	CG34317	FBgn0085346
	SB7	3R	29933287	CG42558	FBgn0260760
	SB7	3R	30122023	CG45072	FBgn0266442
	SB7	3R	30207745	snoRNA:Psi18S-1377a	FBgn0086665
	SB7	3R	30250928	CG9682	FBgn0039760
	SB7	3R	30272762	lncRNA:CR46113	FBgn0267782
	SB7	3R	29863701	Zip99C	FBgn0039714
	SB7	3R	30022345	RpS28a	FBgn0039739
	SB7	3R	30006034	CG7912	FBgn0039736
	SB7	3R	30037003	ocn	FBgn0041102
	SB7	3R	30034540	asRNA:CR44045	FBgn0264837
	SB7	3R	30058311	sima	FBgn0266411	cellular response to insulin stimulus; Dekanty et al. 2005
	SB7	3R	30194790	CG15531	FBgn0039755	lipid metabolic process; FlyBase Curators et al. 2004
	SB7	3R	30043341	Sry-delta	FBgn0003512
	SB7	3R	30207898	snoRNA:Psi28S-2626	FBgn0082983
	SB7	3R	30164692	CG31030	FBgn0051030
	SB7	3R	30048635	CG15528	FBgn0039742
	SB7	3R	30171438	Mlc2	FBgn0002773
	SB7	3R	30015513	Mgat2	FBgn0039738
	SB7	3R	30123801	CG45073	FBgn0266443
	SB7	3R	30213315	CecB	FBgn0000278
	SB7	3R	30037984	janB	FBgn0001281
	SB7	3R	30248616	tRNA:Leu-TAG-1-2	FBgn0051023
	SB7	3R	30026218	lncRNA:CR46111	FBgn0267780
	SB7	3R	29925226	Jon99Ci	FBgn0003358
	SB7	3R	30153022	CG11498	FBgn0039749
	SB7	3R	30277932	hdc	FBgn0010113
	SB7	3R	29857652	CG7824	FBgn0039711
	SB7	3R	30183845	lncRNA:CR44262	FBgn0265202
	SB7	3R	30045229	RpL32	FBgn0002626
	SB7	3R	30247964	tRNA:Leu-TAG-1-1	FBgn0051383
	SB7	3R	30039719	Sry-beta	FBgn0003511
	SB7	3R	30038622	janA	FBgn0001280
	SB7	3R	30180232	Bet5	FBgn0260860
	SB7	3R	30212903	Cec2	FBgn0000281
	SB7	3R	30177877	CG15530	FBgn0039752
	SB7	3R	30206447	RpS7	FBgn0039757
	SB7	3R	30132981	Tpi	FBgn0086355	determination of adult lifespan; Celotto et al. 2006; gluconeogenesis; Gaudet et al. 2010; glucose homeostasis; Ugrankar et al. 2015
	SB7	3R	30209948	Anp	FBgn0000094
	SB7	3R	30000530	Tace	FBgn0039734
Panel/Trait	QTL	Chromosome	Position	Gene Symbol	FlyBase ID	Association with Starvation-Related Trait
pB Male Starvation Resistance	SB2	2L	10423291	Wdfy2	FBgn0032246
	SB2	2L	10182557	Sur	FBgn0028675
	SB2	2L	10251843	Ror	FBgn0010407
	SB2	2L	10314792	CG4972	FBgn0032217
	SB2	2L	10491814	Myo31DF	FBgn0086347
	SB2	2L	10242512	chico	FBgn0024248	determination of adult lifespan; Slack et al. 2015, Libert et al. 2008; response to starvation; Oldham et al. 2002; aging; Clancy et al. 2001; regulation of lipid metabolic process; Gaudet et al. 2010; multicellular organism aging; Clancy et al. 2001; lipid metabolic process; Murillo-Maldonado et al. 2011; glucose homeostasis; Ugrankar et al. 2015; insulin receptor signalling pathway; Bohni et al…
	SB2	2L	10264125	REPTOR-BP	FBgn0032202	regulation of multicellular organismal metabolic process; Tiebe et al. 2015; response to starvation; Tiebe et al. 2015
	SB2	2L	10439440	Nse4	FBgn0032251
	SB2	2L	10489900	CG13144	FBgn0032260
	SB2	2L	10325026	RnrL	FBgn0011703
	SB2	2L	10393774	Mdh1	FBgn0262782	carbohydrate metabolic process; FlyBase Curators et al. 2004
	SB2	2L	10256319	Pten	FBgn0026379	lipid storage; Vereshchagina and Wilson 2006; lipid homeostasis; Gutierrez et al. 2007; response to starvation; Oldham et al. 2002; larval development; Mirth et al. 2005; insulin receptor signalling pathway; Huang et al. 1999; negative regulation of insulin receptor signalling pathway; Oldham et al. 2000; Potter and Xu 2001
	SB2	2L	10295859	CYLD	FBgn0032210	determination of adult lifespan; Xue et al. 2007
	SB2	2L	10311050	l(2)SH0834	FBgn0267365
	SB2	2L	10425483	SmB	FBgn0262601
	SB2	2L	10292679	Hand	FBgn0032209
	SB2	2L	10392867	asRNA:CR45789	FBgn0267439
	SB2	2L	10199401	Ripalpha	FBgn0032189
	SB2	2L	10302173	nmd	FBgn0005322
	SB2	2L	10331471	CG5037	FBgn0032222
	SB2	2L	10202520	CG34159	FBgn0085188
	SB2	2L	10250737	CG31717	FBgn0051717
	SB2	2L	10328200	Schip1	FBgn0032221
	SB2	2L	10201004	RpL7	FBgn0005593
	SB2	2L	10297730	asRNA:CR44968	FBgn0266303
	SB2	2L	10354743	CG5367	FBgn0032228
	SB2	2L	10380103	gny	FBgn0032234	oligosaccharide lipid intermediate biosynthesic process; Gaudet et al. 2010
	SB2	2L	10239341	me31B	FBgn0004419
	SB2	2L	10333734	GATAd	FBgn0032223
	SB2	2L	10426887	KdelR	FBgn0267330
	SB2	2L	10306922	CG4968	FBgn0032214
	SB2	2L	10281943	Ufd4	FBgn0032208
	SB2	2L	10268872	CG4957	FBgn0032205
	SB2	2L	10373369	CG33303	FBgn0053303
	SB2	2L	10224457	CG5708	FBgn0032196
	SB2	2L	10234585	mthl15	FBgn0051720	response to starvation; FlyBase Curators et al. 2004; determination of adult lifespan; FlyBase Curators et al. 2004
	SB2	2L	10347851	CG34367	FBgn0085396
	SB2	2L	10477073	RluA-2	FBgn0032256
	SB2	2L	10396716	Cnot4	FBgn0051716
	SB2	2L	10317497	CG5381	FBgn0032218
	SB2	2L	10441820	lncRNA:CR45375	FBgn0266915
	SB2	2L	10356795	CG5045	FBgn0032229
	SB2	2L	10242685	asRNA:CR44995	FBgn0266330
	SB2	2L	10358134	Cand1	FBgn0027568
	SB2	2L	10254610	CG5676	FBgn0032200
	SB2	2L	10266703	CG4953	FBgn0032204
	SB2	2L	10189820	CG31874	FBgn0051874
	SB2	2L	10271443	trk	FBgn0003751
	SB2	2L	10362989	pim	FBgn0003087
	SB2	2L	10488694	CG6144	FBgn0032259
	SB2	2L	10408352	Ip259	FBgn0025366
	SB2	2L	10432687	TBC1D16	FBgn0032249
	SB2	2L	10403197	CG17768	FBgn0032240
	SB2	2L	10232507	eEF1delta	FBgn0032198
	SB2	2L	10247502	bsk	FBgn0000229
	SB2	2L	10457658	LManII	FBgn0027611
	SB2	2L	10382263	CG5096	FBgn0032235
	SB2	2L	10364471	lft	FBgn0032230
	SB2	2L	10208741	lncRNA:CR44845	FBgn0266139
	SB2	2L	10344442	CG5022	FBgn0032225
	SB2	2L	10342594	Sps2	FBgn0032224	starvation resistance candidate; Harbison et al. 2005
	SB2	2L	10265336	Mob3	FBgn0259482
	SB2	2L	10485538	CG7456	FBgn0032258
	SB2	2L	10227760	CG5694	FBgn0032197
	SB2	2L	10207085	CG5731	FBgn0032192
	SB2	2L	10312265	Usp14	FBgn0032216
	SB2	2L	10094088	CG34109	FBgn0083945
	SB2	2L	10386662	mRpS7	FBgn0032236
	SB2	2L	10431338	TfIIB	FBgn0004915
	SB2	2L	10463340	RluA-1	FBgn0051719
	SB2	2L	10368025	rho-5	FBgn0041723	positive regulation of circadian sleep/wake cycle, wakefullness; Zettl et al. 2011; sleep; Zettl et al. 2011
	SB2	2L	10388105	da	FBgn0267821
	SB2	2L	10172702	CG13137	FBgn0032188
	SB2	2L	10410537	CG5355	FBgn0032242
	SB2	2L	10304069	CG5390	FBgn0032213
	SB2	2L	10420625	pie	FBgn0005683
	SB2	2L	10429920	Bug22	FBgn0032248
	SB2	2L	10222657	CG4908	FBgn0032195
	SB2	2L	10419190	RfC3	FBgn0032244
	SB2	2L	10221351	Prosalpha6	FBgn0250843
	SB2	2L	10442534	loh	FBgn0032252
	SB2	2L	10299977	CG13138	FBgn0032211
	SB2	2L	10209853	CG5727	FBgn0032193
	SB2	2L	10341616	CG31715	FBgn0051715
	SB2	2L	10213812	Npc1a	FBgn0024320
	SB2	2L	10308131	Cdk5alpha	FBgn0027491	determination of adult lifespan; Connell-Crowley et al. 2007; adult locomotory behavior; Connell-Crowley et al. 2007
	SB2	2L	10122129	CG13135	FBgn0032184
	SB2	2L	10483295	Grip75	FBgn0026431
	SB2	2L	10261795	Rsf1	FBgn0011305
	SB2	2L	10322476	CG4995	FBgn0032219
	SB2	2L	10144776	CG4839	FBgn0032187
	SB2	2L	10408352	RpS27A	FBgn0003942
	SB2	2L	10414017	Klp31E	FBgn0032243
	SB2	2L	10435995	holn1	FBgn0032250
	SB2	2L	10452677	LManI	FBgn0032253
	SB2	2L	10339457	SamDC	FBgn0019932
	SB2	2L	10366692	CG5056	FBgn0032231
	SB2	2L	10437548	STUB1	FBgn0027052	negative regulation of insulin receptor signalling pathway; Tawo et al. 2017
	SB2	2L	10204757	CG5734	FBgn0032191	starvation resistance candidate; Sørensen et al. 2007
	SB2	2L	10450134	ppk10	FBgn0065110
	SB2	2L	10405565	Ir31a	FBgn0051718
	SB2	2L	10064121	CG44153	FBgn0265002
	SB2	2L	10376168	dpr19	FBgn0032233
	SB2	2L	10278951	CG34043	FBgn0054043
	SB2	2L	10272325	Utx	FBgn0260749
	SB2	2L	10211143	CG4901	FBgn0032194
	SB2	2L	10384739	Cdk1	FBgn0004106
	SB2	2L	10403197	LSm-4	FBgn0067622
	SB2	2L	10428829	CG5188	FBgn0032247
	SB2	2L	10270051	Mulk	FBgn0260750
	SB3	2L	12172981	crok	FBgn0032421
	SB3	2L	12424904	CG6405	FBgn0032428
	SB3	2L	12431075	SC35	FBgn0265298	starvation resistance candidate; Sørensen et al. 2007
	SB3	2L	12175451	atilla	FBgn0032422
	SB3	2L	12343643	CG43813	FBgn0264361
	SB3	2L	12582402	lncRNA:CR44595	FBgn0265806
	SB3	2L	12170550	CG17217	FBgn0032419
	SB3	2L	12316272	lncRNA:CR45283	FBgn0266821
	SB3	2L	12428028	CG6388	FBgn0032430
	SB3	2L	12171204	CG6583	FBgn0032420
	SB3	2L	12138008	Gr33a	FBgn0032416
	SB3	2L	12451945	CG5418	FBgn0032436	starvation resistance candidate; Sørensen et al. 2007
	SB3	2L	12398274	Pkd2	FBgn0041195	larval feeding behavior; Gao et al. 2004
	SB3	2L	12338848	CG31862	FBgn0051862
	SB3	2L	12496616	t-cup	FBgn0051858
	SB3	2L	12453664	CR17024	FBgn0032437
	SB3	2L	12315777	lncRNA:CR45282	FBgn0266820
	SB3	2L	12455540	bun	FBgn0259176	determination of adult lifespan; Kim et al. 2009
	SB3	2L	12446080	CG5421	FBgn0032434
	SB3	2L	12507939	lncRNA:CR43051	FBgn0262353
	SB3	2L	12570672	lncRNA:CR44598	FBgn0265809
	SB3	2L	12207709	CG31759	FBgn0051759
	SB3	2L	12403270	vir-1	FBgn0043841
	SB3	2L	12441401	Oatp33Ea	FBgn0032433
	SB3	2L	12434452	eRF3	FBgn0020443
	SB3	2L	12130516	rho-6	FBgn0032415
	SB3	2L	12426631	CG5446	FBgn0032429
	SB3	2L	12581445	lncRNA:CR44596	FBgn0265807
	SB3	2L	12433025	snoRNA:SC35-b	FBgn0263469
	SB3	2L	12543176	lncRNA:CR42746	FBgn0261709
	SB3	2L	12174090	lncRNA:CR43356	FBgn0263088
	SB3	2L	12432798	snoRNA:SC35-a	FBgn0263468
	SB3	2L	12142780	CG31760	FBgn0051760
	SB3	2L	12460004	mir-967	FBgn0262203
	SB3	2L	12448484	Oatp33Eb	FBgn0032435
	SB3	2L	12344219	bru2	FBgn0262475
	SB3	2L	12161767	CG31861	FBgn0051861
	SB3	2L	12571160	lncRNA:CR44597	FBgn0265808
	SB3	2L	12164241	ZnT33D	FBgn0051860
	SB3	2L	12587625	nub	FBgn0085424
	SB3	2L	12429827	CG5435	FBgn0032431
	SB3	2L	12508108	snoRNA:CG43051-a	FBgn0263458
	SB3	2L	12175004	bru1	FBgn0000114
	SB3	2L	12610517	Ref2	FBgn0032439
	SB3	2L	12356441	CG17010	FBgn0032424
	SB4	2R	6162197	tRNA:Asn-GTT-1-5	FBgn0011932
	SB4	2R	6623832	CG33919	FBgn0053919
	SB4	2R	6657326	sced	FBgn0013732
	SB4	2R	6169607	tRNA:Arg-ACG-1-3	FBgn0011956
	SB4	2R	6207219	CG17994	FBgn0033072
	SB4	2R	6502006	jing	FBgn0086655
	SB4	2R	6660645	Dpit47	FBgn0266518
	SB4	2R	6166151	tRNA:Ile-AAT-1-1	FBgn0011880
	SB4	2R	6675028	CG17266	FBgn0033089
	SB4	2R	6682521	asRNA:CR44165	FBgn0265050
	SB4	2R	6153506	tRNA:Asn-GTT-1-3	FBgn0011936
	SB4	2R	6662265	Adf1	FBgn0284249	larval locomotory behavior; Sokolowski 2001
	SB4	2R	6162681	tRNA:Lys-CTT-1-2	FBgn0011889
	SB4	2R	6759715	Epac	FBgn0085421
	SB4	2R	6756296	CG3420	FBgn0033100
	SB4	2R	6173684	Cyp6w1	FBgn0033065
	SB4	2R	6225634	tomboy40	FBgn0033074
	SB4	2R	6625242	Vha16-1	FBgn0262736
	SB4	2R	6142165	tRNA:Arg-ACG-1-1	FBgn0011958
	SB4	2R	6179726	CG8343	FBgn0040502
	SB4	2R	6675822	CG9422	FBgn0033092
	SB4	2R	6197387	CG30432	FBgn0050432
	SB4	2R	6673604	PGAP3	FBgn0033088
	SB4	2R	6741899	phtf	FBgn0028579
	SB4	2R	6158597	lncRNA:CR43904	FBgn0264505
	SB4	2R	6684745	Tdc2	FBgn0050446	locomotory behavior; Huang et al. 2013; locomotory rhythm; Hardie et al. 2007
	SB4	2R	6164876	tRNA:Lys-CTT-1-3	FBgn0011888
	SB4	2R	6162519	tRNA:Asn-GTT-1-6	FBgn0011931
	SB4	2R	6746381	Mccc2	FBgn0042083
	SB4	2R	6648654	Debcl	FBgn0029131	cellular response to starvation; Hou et al. 2008
	SB4	2R	6209782	l(2)k14710	FBgn0021847
	SB4	2R	6200853	eIF3f2	FBgn0033069
	SB4	2R	6242004	Pld	FBgn0033075
	SB4	2R	6152603	tRNA:Asn-GTT-1-1	FBgn0011938
	SB4	2R	6600044	CG15233	FBgn0033076
	SB4	2R	6161535	tRNA:Arg-ACG-1-2	FBgn0011957
	SB4	2R	6663395	lncRNA:CR45128	FBgn0266621
	SB4	2R	6721101	l(2)01289	FBgn0010482
	SB4	2R	6716342	Zip42C.1	FBgn0033096	adult locomotory behavior; Lang et al. 2012; determination of adult lifespan; Lang et al. 2012
	SB4	2R	6718196	Zip42C.2	FBgn0033097
	SB4	2R	6695114	Mob4	FBgn0259483
	SB4	2R	6681796	lncRNA:CR44164	FBgn0265049
	SB4	2R	6190129	tRNA:Asn-GTT-1-7	FBgn0011935
	SB4	2R	6653217	Opbp	FBgn0050443
	SB4	2R	6165984	tRNA:Lys-CTT-1-4	FBgn0011887
	SB4	2R	6190372	tRNA:Asn-GTT-1-8	FBgn0011934
	SB4	2R	6153186	tRNA:Asn-GTT-1-2	FBgn0011937
	SB4	2R	6749227	Eb1	FBgn0027066	locomotory behavior; Elliott et al. 2005
	SB4	2R	6636512	Bap170	FBgn0042085
	SB4	2R	6677001	Tdc1	FBgn0259977
	SB4	2R	6693430	CG3270	FBgn0033093
	SB4	2R	6532595	lncRNA:CR43905	FBgn0264506
	SB4	2R	6696739	Rab2	FBgn0014009
	SB4	2R	6171496	tRNA:Lys-CTT-1-5	FBgn0011890
	SB4	2R	6669024	CG9410	FBgn0033086
	SB4	2R	6216197	lncRNA:CR44161	FBgn0265044
	SB4	2R	6162023	tRNA:Asn-GTT-1-4	FBgn0011933
	SB4	2R	6699695	CG45092	FBgn0266525
	SB4	2R	6087873	EcR	FBgn0000546	cholesterol homeostasis; Danielsen et al. 2016; positive regulation of circadian sleep/wake cycle, sleep; Ishimoto and Kitamoto 2010; determination of adult lifespan; Simon et al. 2003; larval wandering behavior; Davis et al. 2005
	SB4	2R	6655463	geminin	FBgn0033081
	SB4	2R	6699695	CG3409	FBgn0033095
	SB4	2R	6668150	CG15908	FBgn0033085
	SB4	2R	6707163	mir-4975	FBgn0263518
	SB4	2R	6683186	CG15909	FBgn0033090
	SB4	2R	6779749	Cyp6a2	FBgn0000473	starvation resistance candidate; Harbison et al. 2005
	SB4	2R	6615752	CR46361	FBgn0286039
	SB4	2R	6707306	lncRNA:CR43611	FBgn0263586
	SB4	2R	6670154	Hsepi	FBgn0033087
	SB4	2R	6202725	CG30431	FBgn0050431
	SB4	2R	6171687	tRNA:Arg-ACG-1-4	FBgn0050316
	SB4	2R	6180926	CG11211	FBgn0033067
	SB4	2R	6178584	tRNA:Arg-ACG-1-5	FBgn0011955
	SB4	2R	6508895	lncRNA:CR45127	FBgn0266620
	SB4	2R	6214568	bin3	FBgn0263144
	SB4	2R	6137303	CG14589	FBgn0033063
	SB4	2R	6757601	CG9436	FBgn0033101
	SB4	2R	6181748	Ptr	FBgn0262867
	SB4	2R	6501032	lncRNA:CR46075	FBgn0267744
	SB4	2R	6633647	Trap1	FBgn0026761	starvation resistance candidate; Sørensen et al. 2007
	SB4	2R	6642418	Fmo-2	FBgn0033079
	SB4	2R	6142372	tRNA:Lys-CTT-1-1	FBgn0011891
	SB5	3L	19140975	fz2	FBgn0016797
	SB5	3L	19097999	CG14079	FBgn0036849
	SB5	3L	19423758	CR33255	FBgn0053255
	SB5	3L	19050757	Acp76A	FBgn0015586
	SB5	3L	19059400	CG3797	FBgn0036842	starvation resistance candidate; Sørensen et al. 2007
	SB5	3L	19294564	fal	FBgn0028380
	SB5	3L	19269351	CG14085	FBgn0036859
	SB5	3L	19269772	CG14088	FBgn0036858
	SB5	3L	19387580	ms(3)76Ba	FBgn0036868
	SB5	3L	19099123	Gem2	FBgn0036850	adult locomotory behavior; Borg and Cauchi 2013
	SB5	3L	19239864	lncRNA:CR43892	FBgn0264484
	SB5	3L	19090583	lncRNA:CR45386	FBgn0266935
	SB5	3L	19266473	CG9629	FBgn0036857
	SB5	3L	19092670	MESR6	FBgn0036846
	SB5	3L	19294727	asRNA:CR46048	FBgn0267715
	SB5	3L	19052902	CG43407	FBgn0263326
	SB5	3L	19248529	lncRNA:CR46216	FBgn0267936
	SB5	3L	19236360	CG33647	FBgn0053647
	SB5	3L	19281364	Gbs-76A	FBgn0036862
	SB5	3L	19105381	CG14082	FBgn0036851
	SB5	3L	19066155	Mkp3	FBgn0036844	starvation resistance candidate; Sørensen et al. 2007
	SB5	3L	19280120	CG14089	FBgn0036861
	SB5	3L	19424702	CR42838	FBgn0262027
	SB5	3L	19255340	rept	FBgn0040075
	SB5	3L	19263766	CG9666	FBgn0036856
	SB5	3L	19253290	mRpL21	FBgn0036853
	SB5	3L	19420390	hpRNA:CR32205	FBgn0052205
	SB5	3L	19275791	CG14086	FBgn0036860
	SB5	3L	19052302	lncRNA:CR44675	FBgn0265886
	SB5	3L	19096399	CG10424	FBgn0036848
	SB5	3L	19063165	Sfxn2	FBgn0036843
	SB5	3L	19033317	lncRNA:CR45940	FBgn0267602
	SB5	3L	19262232	Max	FBgn0017578
	SB5	3L	19229061	lncRNA:CR43893	FBgn0264485
	SB5	3L	19405539	lncRNA:CR43966	FBgn0264697
	SB5	3L	19183998	lncRNA:CR45941	FBgn0267603
	SB5	3L	19261394	Bet1	FBgn0260857
	SB5	3L	19263766	CG42374	FBgn0259720
	SB5	3L	19128450	Spn75F	FBgn0052203
	SB5	3L	19340321	CG32206	FBgn0052206
	SB5	3L	19266061	CG45081	FBgn0266456
	SB5	3L	19298623	pip	FBgn0003089
	SB5	3L	19094890	CNPYb	FBgn0036847
	SB5	3L	19260040	asRNA:CR45210	FBgn0266737
	SB5	3L	19257282	nes	FBgn0026630
	SB5	3L	19003741	nkd	FBgn0002945
	SB6	3R	13264364	Su(var)3-7	FBgn0003598
	SB6	3R	12998089	CG7518	FBgn0038108	starvation resistance candidate; Sørensen et al. 2007
	SB6	3R	13030913	l(3)87Df	FBgn0002354
	SB6	3R	13298768	CG8774	FBgn0038136
	SB6	3R	13302648	CG32473	FBgn0052473	starvation resistance candidate; Sørensen et al. 2007
	SB6	3R	13294748	CG8773	FBgn0038135
	SB6	3R	12767178	lncRNA:CR44233	FBgn0265164
	SB6	3R	12891956	d-cup	FBgn0038089
	SB6	3R	13032528	ry	FBgn0003308	determination of adult lifespan; Simonsen et al. 2007
	SB6	3R	12850380	lncRNA:CR44234	FBgn0265165
	SB6	3R	12855544	CG10126	FBgn0038088
	SB6	3R	12980792	Paip2	FBgn0038100
	SB6	3R	12991449	yellow-f	FBgn0041710
	SB6	3R	13105070	lncRNA:CR46019	FBgn0267683
	SB6	3R	13260356	CG11686	FBgn0040551
	SB6	3R	12996876	CG44194	FBgn0265083
	SB6	3R	12930734	lncRNA:CR44236	FBgn0265167
	SB6	3R	13047731	CG31157	FBgn0051157
	SB6	3R	12811145	CG31345	FBgn0051345
	SB6	3R	13044157	CG45122	FBgn0266615
	SB6	3R	12849090	lncRNA:CR45587	FBgn0267147
	SB6	3R	13222951	Ace	FBgn0000024
	SB6	3R	13370240	Lip3	FBgn0023495	lipid metabolic process; FlyBase Curators et al. 2004
	SB6	3R	13044759	Hsc70-2	FBgn0001217
	SB6	3R	13379842	CG8870	FBgn0038144
	SB6	3R	13181304	CG8138	FBgn0038122
	SB6	3R	13312855	CG44142	FBgn0264991
	SB6	3R	13382106	Droj2	FBgn0038145
	SB6	3R	13185526	CG8508	FBgn0038123
	SB6	3R	13028920	CG46281	FBgn0283439
	SB6	3R	12873131	lncRNA:CR46218	FBgn0267938
	SB6	3R	12993395	yellow-f2	FBgn0038105
	SB6	3R	12891911	asRNA:CR44235	FBgn0265166
	SB6	3R	12840560	beat-Va	FBgn0038087
	SB6	3R	13011649	CtBP	FBgn0020496
	SB6	3R	13088651	timeout	FBgn0038118	entrainment of circadian clock; Benna et al. 2010
	SB6	3R	13026283	CG46280	FBgn0283438
	SB6	3R	13089242	CG34308	FBgn0085337
	SB6	3R	13085478	lncRNA:CR44967	FBgn0266302
	SB6	3R	13269137	TBC1D5	FBgn0038129
	SB6	3R	13049398	CG7966	FBgn0038115
	SB6	3R	13381276	mRpS21	FBgn0044511
	SB6	3R	12995620	CG7488	FBgn0038106
	SB6	3R	13208754	CG8483	FBgn0038126
	SB6	3R	12767627	lncRNA:CR44232	FBgn0265163
	SB6	3R	12987376	CG14383	FBgn0038102
	SB6	3R	13318991	CG45080	FBgn0266455
	SB6	3R	12978000	CG7091	FBgn0038099
	SB6	3R	12746036	beat-Vc	FBgn0038084
	SB6	3R	13369648	CheA87a	FBgn0038142
	SB6	3R	12910120	CG10909	FBgn0038090
	SB6	3R	13373104	CG9813	FBgn0038143
	SB6	3R	13188519	CG14380	FBgn0038124
	SB6	3R	13361816	poly	FBgn0086371	insulin receptor signalling pathway; Bolukbasi et al. 2012
	SB6	3R	12986041	CG31342	FBgn0051342	starvation resistance candidate; Sørensen et al. 2007
	SB6	3R	13191599	CG8141	FBgn0038125
	SB6	3R	13009895	CG11656	FBgn0038109
	SB6	3R	13364938	Dic1	FBgn0027610
	SB6	3R	13219644	CG8476	FBgn0038127
	SB6	3R	12833127	lncRNA:CR46217	FBgn0267937
	SB6	3R	13121951	2mit	FBgn0260793
	SB6	3R	12963791	Cyp304a1	FBgn0038095
	SB6	3R	12950042	grsm	FBgn0040493
	SB6	3R	13338330	PK2-R1	FBgn0038140
	SB6	3R	13086224	CG43063	FBgn0262365
	SB6	3R	13132429	lncRNA:CR45109	FBgn0266578
	SB6	3R	13008384	CG8031	FBgn0038110
	SB6	3R	13057755	sim	FBgn0004666
	SB6	3R	13279721	CG8630	FBgn0038130	lipid metabolic process; FlyBase Curators et al. 2004
	SB6	3R	13329070	PK2-R2	FBgn0038139
	SB6	3R	12916056	beat-Vb	FBgn0038092
	SB6	3R	13290629	Osi22	FBgn0038133
	SB6	3R	13376903	lncRNA:CR44138	FBgn0264987
	SB6	3R	12893972	CR33929	FBgn0053929
	SB6	3R	13372630	CG34309	FBgn0259831
	SB6	3R	12967775	CG7381	FBgn0038098
	SB6	3R	12961745	Spc25	FBgn0087021
	SB6	3R	13040165	snk	FBgn0003450
	SB6	3R	12996876	CG17327	FBgn0038107
	SB6	3R	13262733	Ravus	FBgn0038128
	SB6	3R	13303426	CG43208	FBgn0262844
	SB6	3R	13038375	CG11668	FBgn0038113
	SB6	3R	13292052	wntD	FBgn0038134
	SB6	3R	13052245	pic	FBgn0260962
	SB6	3R	12965938	CG14384	FBgn0038097
	SB6	3R	13284946	CG15888	FBgn0038131
	SB6	3R	13042050	CG11670	FBgn0038114
	SB6	3R	12744672	lncRNA:CR46238	FBgn0267958
	SB6	3R	13287655	CG15887	FBgn0038132
	SB6	3R	13353673	mthl12	FBgn0045442	response to starvation; UniProt Curators 2002; determination of adult lifespan; UniProt Curators 2002
Panel/Trait	QTL	Chromosome	Position	Gene Symbol	FlyBase ID	Association with Starvation-Related Trait
pB Female Triglyceride Level	TB1	3L	3688786	lncRNA:CR43484	FBgn0263495
	TB1	3L	3951193	CG14984	FBgn0035480
	TB1	3L	4021457	Mul1	FBgn0035483
	TB1	3L	3428658	eIF5B	FBgn0026259
	TB1	3L	3825449	Rdh	FBgn0064227	carbohydrate metabolic process; FlyBase Curators et al. 2004
	TB1	3L	4022700	CG11594	FBgn0035484
	TB1	3L	3899259	Ubi-p63E	FBgn0003943
	TB1	3L	4072032	Faa	FBgn0016013
	TB1	3L	3897444	Ccz1	FBgn0035470
	TB1	3L	4087581	CG14989	FBgn0035495
	TB1	3L	3620433	CG14974	FBgn0040694
	TB1	3L	3653405	CG10862	FBgn0035455
	TB1	3L	3483832	CG43074	FBgn0262484
	TB1	3L	3954251	CG12605	FBgn0035481
	TB1	3L	3940519	asRNA:CR43916	FBgn0264517
	TB1	3L	3472447	CG42324	FBgn0259224
	TB1	3L	3803832	ntc	FBgn0035461
	TB1	3L	3810312	CG32263	FBgn0052263
	TB1	3L	3811263	PIG-B	FBgn0035464
	TB1	3L	3818679	enc	FBgn0004875
	TB1	3L	4018878	FoxL1	FBgn0004895
	TB1	3L	4028605	Gr64b	FBgn0045478
	TB1	3L	4062292	dib	FBgn0000449
	TB1	3L	4035799	Gr64f	FBgn0052255
	TB1	3L	4032062	Gr64d	FBgn0035486
	TB1	3L	3983896	scrt	FBgn0004880
	TB1	3L	3814211	Scsalpha	FBgn0004888
	TB1	3L	3846206	Awh	FBgn0013751
	TB1	3L	3790804	CG32266	FBgn0052266
	TB1	3L	3938624	CG12766	FBgn0035476	starvation resistance candidate; Sørensen et al. 2007
	TB1	3L	3555631	lncRNA:CR45820	FBgn0267470
	TB1	3L	4003474	CG14985	FBgn0035482
	TB1	3L	3894999	Gr63a	FBgn0035468	determination of adult lifespan; Poon et al. 2010; sensory perception of taste; Dunipace et al. 2001
	TB1	3L	3891646	lncRNA:CR45422	FBgn0266971
	TB1	3L	3905344	ida	FBgn0041147
	TB1	3L	4034030	asRNA:CR45042	FBgn0266402
	TB1	3L	3814698	lncRNA:CR43932	FBgn0264553
	TB1	3L	3936060	CG10866	FBgn0035475
	TB1	3L	3893056	snRNA:U11	FBgn0083987
	TB1	3L	3896900	CG14977	FBgn0035469
	TB1	3L	3753693	ppk27	FBgn0035458
	TB1	3L	3626352	dar1	FBgn0263239
	TB1	3L	3947891	CG10853	FBgn0035478
	TB1	3L	3941008	CG10863	FBgn0027552
	TB1	3L	3903492	Sc2	FBgn0035471
	TB1	3L	3809146	CG32262	FBgn0052262
	TB1	3L	3907852	mge	FBgn0035473
	TB1	3L	4037523	CG11593	FBgn0035488
	TB1	3L	3612192	CG10359	FBgn0035452
	TB1	3L	4032141	Gr64e	FBgn0045476
	TB1	3L	3693752	lncRNA:CR43485	FBgn0263496
	TB1	3L	3471555	CG32267	FBgn0052267
	TB1	3L	3815839	Acp63F	FBgn0015585
	TB1	3L	3942710	CG14982	FBgn0035477
	TB1	3L	3714826	CG32264	FBgn0052264
	TB1	3L	3466428	CycJ	FBgn0010317
	TB1	3L	3714027	CG43089	FBgn0262535
	TB1	3L	3615382	CG10357	FBgn0035453	lipid catabolic process; FlyBase Curators 2008
	TB1	3L	4059770	CG18869	FBgn0042179	metabolic process; FlyBase Curators et al. 2004
	TB1	3L	4040529	Rcd5	FBgn0263832
	TB1	3L	3806710	IntS10	FBgn0035462
	TB1	3L	3892574	Fie	FBgn0026592
	TB1	3L	3510974	ImpE2	FBgn0001254
	TB1	3L	4074077	Gad1	FBgn0004516	larval locomotory behavior; Featherstone et al. 2000
	TB1	3L	3468023	CG14971	FBgn0035449
	TB1	3L	3972899	CG43915	FBgn0264516
	TB1	3L	4046596	CG1136	FBgn0035490
	TB1	3L	3948699	CG14983	FBgn0035479
	TB1	3L	3815442	lncRNA:CR45034	FBgn0266394
	TB1	3L	3884481	lncRNA:CR43917	FBgn0264518
	TB1	3L	3461317	armi	FBgn0041164
	TB1	3L	3659068	CG43098	FBgn0262544
	TB1	3L	4064152	wit	FBgn0024179
	TB1	3L	3909973	Eip63F-1	FBgn0004910
	TB1	3L	3863704	lncRNA:CR45379	FBgn0266928
	TB1	3L	4069369	CG32259	FBgn0052259
	TB1	3L	3593823	snRNA:U7	FBgn0053504
	TB1	3L	3708563	lncRNA:CR45675	FBgn0267235
	TB1	3L	4028605	Gr64c	FBgn0045477
	TB1	3L	4026769	Gr64a	FBgn0045479
	TB1	3L	4046988	Dpy-30L2	FBgn0035491
	TB1	3L	3522850	lncRNA:CR45043	FBgn0266403
	TB1	3L	3515751	Eip63E	FBgn0005640	instar larval development; Stowers et al. 2010
	TB1	3L	3934718	asRNA:Eig63F-2	FBgn0004911
	TB2	3R	11883938	mthl5	FBgn0037960	response to starvation; UniProt Curators 2002; determination of adult lifespan; UniProt Curators 2002
	TB2	3R	11680972	CG6830	FBgn0037934
	TB2	3R	11980704	CG12224	FBgn0037974
	TB2	3R	11354348	lncRNA:CR46009	FBgn0267673
	TB2	3R	11684672	CG6834	FBgn0037935
	TB2	3R	11750333	CG43062	FBgn0262364
	TB2	3R	11408792	mgr	FBgn0264694
	TB2	3R	11575901	CG6790	FBgn0037915
	TB2	3R	11704030	I-t	FBgn0025821	starvation resistance candidate; Sørensen et al. 2007
	TB2	3R	11797244	ClC-a	FBgn0051116
	TB2	3R	11984862	mfas	FBgn0260745
	TB2	3R	11418885	CG45676	FBgn0267236
	TB2	3R	11963124	aurA	FBgn0000147
	TB2	3R	11967708	GC1	FBgn0260743
	TB2	3R	12028070	CG42504	FBgn0260230
	TB2	3R	11356106	lncRNA:CR46010	FBgn0267674
	TB2	3R	11688381	CG6908	FBgn0037936
	TB2	3R	12040528	CG14736	FBgn0037986
	TB2	3R	11437785	CG17230	FBgn0046225
	TB2	3R	11892306	CG6971	FBgn0037962
	TB2	3R	11949680	CG31211	FBgn0051211
	TB2	3R	11578826	CG5342	FBgn0037916
	TB2	3R	11897582	CG34307	FBgn0085336
	TB2	3R	11822702	CG6959	FBgn0037956
	TB2	3R	11983098	CG3397	FBgn0037975
	TB2	3R	11435850	CG5281	FBgn0037902
	TB2	3R	11623339	CG14711	FBgn0037922
	TB2	3R	12162887	Cpn	FBgn0261714
	TB2	3R	11581576	wkd	FBgn0037917
	TB2	3R	11820381	CG6950	FBgn0037955
	TB2	3R	11431738	CG5276	FBgn0037900
	TB2	3R	11535495	asRNA:CR45056	FBgn0266416
	TB2	3R	11882790	CG31368	FBgn0051368
	TB2	3R	11433488	CG6744	FBgn0037901
	TB2	3R	11437547	sals	FBgn0051374
	TB2	3R	11407918	mRpL40	FBgn0037892
	TB2	3R	11736810	Blm	FBgn0002906
	TB2	3R	11674920	CG18476	FBgn0037931
	TB2	3R	12017156	Spt3	FBgn0037981
	TB2	3R	11559896	sea	FBgn0037912
	TB2	3R	12048253	CG14739	FBgn0037987
	TB2	3R	11711718	CG14720	FBgn0037940
	TB2	3R	11419376	ninaG	FBgn0037896
	TB2	3R	12028070	CG42505	FBgn0260231
	TB2	3R	11628759	CG14712	FBgn0037924
	TB2	3R	11994175	Tk	FBgn0037976	lipid metabolic process; Song et al. 2014
	TB2	3R	11999278	Ect3	FBgn0260746	carbohydrate metabolic process; FlyBase Curators et al. 2004
	TB2	3R	11696509	CG14717	FBgn0265271
	TB2	3R	11971007	Tango9	FBgn0260744
	TB2	3R	11702913	lncRNA:CR46011	FBgn0267675
	TB2	3R	11958535	Hsp70Ab	FBgn0013276
	TB2	3R	11971694	GC2	FBgn0037970
	TB2	3R	12121583	CG4702	FBgn0037992
	TB2	3R	11815206	glo	FBgn0259139
	TB2	3R	12094876	dpr17	FBgn0051361
	TB2	3R	11954163	Hsp70Aa	FBgn0013275
	TB2	3R	12138833	dpr15	FBgn0037993
	TB2	3R	11585354	CG6791	FBgn0037918
	TB2	3R	11765038	l(3)neo38	FBgn0265276
	TB2	3R	11430740	RpL24-like	FBgn0037899
	TB2	3R	11741890	CG14722	FBgn0037943
	TB2	3R	12131356	tRNA:Lys-TTT-2-5	FBgn0011905
	TB2	3R	11721734	CG12594	FBgn0037941
	TB2	3R	12061070	CG14740	FBgn0037988
	TB2	3R	11412522	Ranbp9	FBgn0037894
	TB2	3R	11422092	CG5270	FBgn0037897
	TB2	3R	11569250	Mrp4	FBgn0263316	determination of adult lifespan; Huang et al. 2014
	TB2	3R	11744229	CG6923	FBgn0037944
	TB2	3R	11590386	Jupiter	FBgn0051363
	TB2	3R	11877235	sad	FBgn0003312
	TB2	3R	11679743	Ho	FBgn0037933
	TB2	3R	11626889	CG18764	FBgn0042205
	TB2	3R	11650971	Elp1	FBgn0037926
	TB2	3R	11533483	dpr4	FBgn0053512
	TB2	3R	12027736	CG31358	FBgn0051358
	TB2	3R	11656149	CG42327	FBgn0259227
	TB2	3R	11789293	Sbf	FBgn0025802
	TB2	3R	11750931	Lk6	FBgn0017581
	TB2	3R	11931262	CG14731	FBgn0037964
	TB2	3R	11700614	CG14718	FBgn0037939
	TB2	3R	11879702	CG6962	FBgn0037958
	TB2	3R	11977640	lncRNA:CR44135	FBgn0264984
	TB2	3R	12068375	ATP8B	FBgn0037989
	TB2	3R	11735447	CG14721	FBgn0037942
	TB2	3R	11559896	fabp	FBgn0037913
	TB2	3R	11328480	pros	FBgn0004595
	TB2	3R	11430061	Dtd	FBgn0037898
	TB2	3R	11975156	CG10005	FBgn0037972
	TB2	3R	11674221	CG14715	FBgn0037930
	TB2	3R	11620090	CG14710	FBgn0037920
	TB2	3R	11633278	Csk	FBgn0262081
	TB2	3R	12033142	ssp5	FBgn0037985
	TB2	3R	12010772	GCC185	FBgn0037979
	TB2	3R	11499984	dpr5	FBgn0037908
	TB2	3R	11625051	CG6813	FBgn0037923
	TB2	3R	12007476	KLHL18	FBgn0037978
	TB2	3R	12014943	DCAF12	FBgn0037980
	TB2	3R	11486788	lncRNA:CR45581	FBgn0267141
	TB2	3R	11410848	snoRNA:Irbp-a	FBgn0263480
	TB2	3R	11416218	CG6723	FBgn0037895
	TB2	3R	11557776	CG10898	FBgn0037911
	TB2	3R	11554145	CG14708	FBgn0037910
	TB2	3R	11780641	lncRNA:CR45595	FBgn0267155
	TB2	3R	11442192	mir-4945	FBgn0263520
	TB2	3R	11410047	Irbp	FBgn0011774
	TB2	3R	11787176	HisCl1	FBgn0037950
	TB2	3R	11678386	Taf12	FBgn0011290
	TB2	3R	11960883	CG3281	FBgn0260741
	TB2	3R	11693410	Fer3	FBgn0037937
	TB2	3R	11452849	PGRP-LB	FBgn0037906
	TB2	3R	11621466	CG6808	FBgn0037921
	TB2	3R	11819359	COX5A	FBgn0019624
	TB2	3R	11978574	CG18547	FBgn0037973
	TB2	3R	11964674	CG12213	FBgn0260742
	TB2	3R	11637177	asRNA:CR44137	FBgn0264986
	TB2	3R	11781131	CG17360	FBgn0037949
	TB2	3R	11690386	CG18765	FBgn0042110
	TB2	3R	11893512	Cad87A	FBgn0037963
	TB3	3R	12705523	mus308	FBgn0002905
	TB3	3R	12767178	lncRNA:CR44233	FBgn0265164
	TB3	3R	12505793	Hsp70Bb	FBgn0013278
	TB3	3R	12767627	lncRNA:CR44232	FBgn0265163
	TB3	3R	12526188	Hug	FBgn0028374	larval feeding behavior; Melcher and Pankratz 2005
	TB3	3R	12855544	CG10126	FBgn0038088
	TB3	3R	12850380	lncRNA:CR44234	FBgn0265165
	TB3	3R	12746036	beat-Vc	FBgn0038084
	TB3	3R	12727759	lncRNA:CR44231	FBgn0265162
	TB3	3R	12508260	CR46155	FBgn0267867
	TB3	3R	12551515	mir-284	FBgn0262383
	TB3	3R	12502510	Hsp70Bbb	FBgn0051354
	TB3	3R	12511570	Octbeta3R	FBgn0250910
	TB3	3R	12532699	lncRNA:CR46016	FBgn0267680
	TB3	3R	12676487	mbo	FBgn0026207
	TB3	3R	12623762	Vha55	FBgn0005671
	TB3	3R	12630647	Not10	FBgn0260444
	TB3	3R	12654577	CG6225	FBgn0038072
	TB3	3R	12811145	CG31345	FBgn0051345
	TB3	3R	12849090	lncRNA:CR45587	FBgn0267147
	TB3	3R	12634192	asRNA:CR46018	FBgn0267682
	TB3	3R	12628031	Snx3	FBgn0038065
	TB3	3R	12662831	CG14395	FBgn0038073
	TB3	3R	12833127	lncRNA:CR46217	FBgn0267937
	TB3	3R	12550625	Octbeta2R	FBgn0038063
	TB3	3R	12640163	CG6753	FBgn0038070	lipid metabolic process; FlyBase Curators et al. 2004
	TB3	3R	12705094	CG12279	FBgn0038080
	TB3	3R	12636540	CG11600	FBgn0038068	lipid metabolic process; FlyBase Curators et al. 2004
	TB3	3R	12691733	CG31347	FBgn0051347
	TB3	3R	12689873	Su(fu)	FBgn0005355
	TB3	3R	12695129	NijC	FBgn0038079
	TB3	3R	12679279	Cyp313a4	FBgn0038076
	TB3	3R	12509076	Hsp70Bc	FBgn0013279
	TB3	3R	12694229	CG14391	FBgn0038078
	TB3	3R	12691743	Arp1	FBgn0011745
	TB3	3R	12618876	lncRNA:CR44942	FBgn0266247
	TB3	3R	12504977	CR46154	FBgn0267866
	TB3	3R	12873131	lncRNA:CR46218	FBgn0267938
	TB3	3R	12634917	CG11598	FBgn0038067	lipid metabolic process; FlyBase Curators et al. 2004
[truncated: 19 more rows]
